# Supplementary material for: The Transcriptome of Compatible and Incompatible Interactions of Potato (Solanum tuberosum) with Phytophthora infestans Revealed by DeepSAGE Analysis
Source: PLoS One. 2012 Feb 6;7(2):e31526. doi: 10.1371/journal.pone.0031526 (PMC3273468; doi:10.1371/journal.pone.0031526)
Supplement: Table S9 — Tag identification, sequence, annotation and normalized tag counts (Columns X to BO) of 199 unitags differentially regulated (FDR<0.05) in ORF45 versus R1 and r1 at 0 dpi; log-fold change values (logFC) and false discovery rates (FDR) of the nine pair wise comparisons (columns E to V) between sample groups ( Fig. 4 ). FDR values<0.05 are highlighted white. (XLSX) [file pone.0031526.s009.xlsx]

## Sheet: ORF45 specific at 0dpi
Tag-ID	Tag sequence (5'-CATG-17n-3')	Primary Annotation ID	All annotations	logFC R1_1dpi versus R1_0dpi	FDR R1_1dpi versus R1_0dpi	logFC R1_3dpi versus R1_0dpi	FDR R1_3dpi versus R1_0dpi	logFC r1_1dpi versus r1_0dpi	FDR r1_1dpi versus r1_0dpi	logFC r1_3dpi versus r1_0dpi	FDR r1_3dpi versus r1_0dpi	logFC ORF45_1dpi versus ORF45_0dpi	FDR ORF45_1dpi versus ORF45_0dpi	logFC ORF45_3dpi versus ORF45_0dpi	FDR ORF45_3dpi versus ORF45_0dpi	logFC R1_0dpi versus r1_0dpi	FDR R1_0dpi versus r1_0dpi	logFC r1_0dpi versus ORF45_0dpi	FDR r1_0dpi versus ORF45_0dpi	logFC R1_0dpi versus ORF45_0dpi	FDR R1_0dpi versus ORF45_0dpi	Mean_All [counts/million]	R1(10-2/4) 0dpi_Rep1 [counts/million]	R1(10-2/4) 0dpi_Rep2 [counts/million]	R1(10-2/4) 0dpi_Rep3 [counts/million]	R1(10-23/2) 0dpi_Rep1 [counts/million]	R1(10-23/2) 0dpi_Rep2 [counts/million]	R1(10-23/2) 0dpi_Rep3 [counts/million]	R1(10-2/4) 1dpi_Rep1 [counts/million]	R1(10-2/4) 1dpi_Rep2 [counts/million]	R1(10-2/4) 1dpi_Rep3 [counts/million]	R1(10-23/2) 1dpi_Rep1 [counts/million]	R1(10-23/2) 1dpi_Rep2 [counts/million]	R1(10-23/2) 1dpi_Rep3 [counts/million]	R1(10-2/4) 3dpi_Rep1 [counts/million]	R1(10-2/4) 3dpi_Rep2 [counts/million]	R1(10-2/4) 3dpi_Rep3 [counts/million]	R1(10-23/2) 3dpi_Rep1 [counts/million]	R1(10-23/2) 3dpi_Rep2 [counts/million]	R1(10-23/2) 3dpi_Rep3 [counts/million]	r1(wt) 0dpi_Rep1 [counts/million]	r1(wt) 0dpi_Rep2 [counts/million]	r1(wt) 0dpi_Rep3 [counts/million]	r1(LV41) 0dpi_Rep1 [counts/million]	r1(LV41) 0dpi_Rep2 [counts/million]	r1(LV41) 0dpi_Rep3 [counts/million]	r1(wt) 1dpi_Rep1 [counts/million]	r1(wt) 1dpi_Rep2 [counts/million]	r1(wt) 1dpi_Rep3 [counts/million]
StET028825	TTGGGAACTTTTATTTA	BQ112823	BQ112823|-|NA|-|41-57|#|	2.25998	0.371113	0.770998	0.797767	2.76296	0.126199	3.15483	0.111039	-0.702986	1	-3.1806	0.972832	-0.158269	1	-4.2722	0.00845397	-4.38399	0.0129834	5.09	0	0	0	0	0	0	0	0	7.19	16.65	0	3.99	0	0	0	0	3.63	0	0	0	0	0	0	0	2.95	12.62	31.6
StET014937	GAGTTGCATTTCAACAA	BQ114945	BQ114945|-|similar to UniRef100_P08927 Cluster: RuBisCO large subunit-binding protein subunit beta, chloroplast precursor; n=1; Pisum sativum|Rep: RuBisCO large subunit-binding protein subunit beta, chloroplast precursor - Pisum sativum (Garden pea), partial (12%)|-|496-512|#|	1.99094	0.556262	1.03915	0.63786	2.12794	0.302038	-0.709587	0.585804	-3.99746	0.152926	-3.05931	0.432009	-0.576752	0.914892	-3.17104	0.0261589	-3.8159	0.00523705	2.64	0	0	0	0	0	0	17.74	3.77	3.59	0	0	0	8.29	0	0	0	0	0	0	0	0	0	0	5.13	5.31	0	0
StET000056	AAAAAAGGGAGGGGATT	BQ504563	BQ504563|-|similar to UniRef100_UPI000034F120 Cluster: glycosyltransferase family 14 protein / core-2/I-branching enzyme family protein; n=1; Arabidopsis thaliana|Rep: glycosyltransferase family 14 protein / core-2/I-branching enzyme family protein - Arabidopsis thaliana, partial (45%)|-|53-69|#|	0.145702	1	-1.05657	0.578614	2.84956	0.20796	1.13543	0.561111	-3.91057	0.0234894	-3.37828	0.196973	0.93613	0.669624	-3.9373	8.91723e-05	-3.05859	0.0129834	2.54	0	6.39	0	0	0	0	0	0	7.19	0	3.66	0	0	0	0	0	0	0	0	0	0	0	0	0	0	0	0
StET008299	ATTAATCGGTTCTTGTT	CK252537	CK252537|-|similar to UniRef100_Q9Y1J8 Cluster: Nuclear receptor GRF; n=1; Bombyx mori|Rep: Nuclear receptor GRF - Bombyx mori (Silk moth), partial (4%)|-|823-840|#|	1.57185	0.650413	0.619161	0.797767	-0.197162	1	2.36384	0.229706	0.409964	1	-0.959691	0.988583	-0.158269	1	-3.40469	0.00388745	-3.53878	0.00635142	2.92	0	0	0	0	0	0	0	2.51	0	14.98	0	0	3.55	0	0	0	1.45	0	0	0	0	0	0	0	0	0	0
StET018871	GTGATTAAGAAATCAAA	CK716451	CK716451|-|similar to UniRef100_A7PHH8 Cluster: Chromosome chr17 scaffold_16, whole genome shotgun sequence; n=1; Vitis vinifera|Rep: Chromosome chr17 scaffold_16, whole genome shotgun sequence - Vitis vinifera (Grape), partial (33%)|-|282-299|#|BE472138|-|similar to UniRef100_A7PHH8 Cluster: Chromosome chr17 scaffold_16, whole genome shotgun sequence; n=1; Vitis vinifera|Rep: Chromosome chr17 sc…	-0.552466	0.814457	2.55945	0.233323	-0.197162	1	0.452404	0.956157	1.07532	0.914232	-2.4974	0.636058	-0.158269	1	-3.12798	0.0199436	-3.25479	0.028989	2.54	0	0	0	0	0	0	0	0	0	0	0	0	4.74	0	0	26.75	2.91	0	0	0	0	0	0	0	0	0	0
StET018477	GTATTGAAAAAATGATA	CV503598	CV503598|-|homologue to UniRef100_Q43775 Cluster: Glycolate oxidase; n=1; Solanum lycopersicum|Rep: Glycolate oxidase - Solanum lycopersicum (Tomato) (Lycopersicon esculentum), partial (67%)|-|42-58|#|	0.151093	1	0.226718	1	0.043808	1	-0.708742	0.631956	0.175768	1	-2.07264	0.116999	-0.0608797	1	-1.96702	0.0437455	-2.08911	0.00552581	2.79	0	1.6	2.14	1.93	3.76	3.69	2.42	2.51	4.49	2.5	2.44	1.33	0	4.22	2.75	2.77	2.91	2.73	0	3.48	2.33	0	1.68	6.84	4.13	1.68	0
StET018487	GTATTGAGAAACTGATA	CV503598	CV503598|-|homologue to UniRef100_Q43775 Cluster: Glycolate oxidase; n=1; Solanum lycopersicum|Rep: Glycolate oxidase - Solanum lycopersicum (Tomato) (Lycopersicon esculentum), partial (67%)|-|42-58|#|	0.614597	0.65291	-0.639574	0.52338	-0.575958	0.796412	0.0109534	1	-0.208684	0.897248	-1.52073	0.255396	0.403232	0.782508	-1.90176	0.00466868	-1.51223	0.0443951	2.84	6.78	3.2	2.14	0	0	5.54	3.22	7.54	1.8	6.66	4.88	5.32	0	0	0	2.77	2.91	1.82	0	2.32	2.33	0	4.19	3.42	2.36	0	0
StET005289	AGCATGTACTTTTCATA	CX162445	CX162445|-|NA|-|219-236|#|TC212710|-|UniRef100_Q93XJ9 Cluster: Ferredoxin I precursor; n=1; Solanum tuberosum|Rep: Ferredoxin I precursor - Solanum tuberosum (Potato), partial (97%)|-|539-556|#|TC214362|-|UniRef100_Q93XJ9 Cluster: Ferredoxin I precursor; n=1; Solanum tuberosum|Rep: Ferredoxin I precursor - Solanum tuberosum (Potato), complete|-|501-518|#|	0.293274	0.873287	-0.220342	1	-0.993096	0.0847969	-0.929176	0.291254	-0.79819	0.282062	-2.17672	0.106475	-0.317926	0.759353	-1.60231	7.93669e-09	-1.91849	0.00570152	11.11	3.39	19.98	5.7	7.73	7.51	14.78	5.64	15.08	10.78	14.15	17.07	10.64	0	6.32	0	5.53	11.62	20.94	12.37	16.23	15.11	6.9	14.25	13.68	4.72	6.73	0
StET005258	AGCATCTACTTTTCATA	CX162445	CX162445|-|NA|-|219-236|#|TC212710|-|UniRef100_Q93XJ9 Cluster: Ferredoxin I precursor; n=1; Solanum tuberosum|Rep: Ferredoxin I precursor - Solanum tuberosum (Potato), partial (97%)|-|539-556|#|TC214362|-|UniRef100_Q93XJ9 Cluster: Ferredoxin I precursor; n=1; Solanum tuberosum|Rep: Ferredoxin I precursor - Solanum tuberosum (Potato), complete|-|501-518|#|	-0.311776	0.893801	-0.646521	0.553957	-0.92159	0.219417	-1.3746	0.0597906	-1.06659	0.243586	-2.11125	0.000521524	0.100792	1	-1.4687	0.00021355	-1.38615	0.0187015	12.41	10.16	27.17	10.68	18.36	7.51	18.47	5.64	10.06	22.46	10.82	18.9	5.98	0	6.32	10.1	11.99	15.98	10.01	15.46	25.5	19.77	10.35	10.06	10.26	15.34	3.36	0
StET022228	TAGGCACTATAGCATCT	DN941846	DN941846|-|UniRef100_Q6RH11 Cluster: 40S ribosomal protein S5; n=1; Capsicum annuum|Rep: 40S ribosomal protein S5 - Capsicum annuum (Bell pepper), partial (69%)|-|109-125|#|	0.554838	0.35924	0.403801	0.363851	0.309745	0.430008	0.172084	0.70444	0.295321	0.897248	1.22311	5.53784e-06	-0.143389	0.622086	1.13788	5.10998e-12	1.00269	0.000202027	233.89	238.84	214.16	244.24	240.6	195.27	122.83	372.44	248.86	473.44	366.26	124.99	228.74	298.54	356.22	240.45	452.84	185.24	136.56	265.97	235.31	231.37	207.78	197.01	247.98	286.7	314.59	438.18
StET004630	AGAACTAATAAACATCT	FG549408	FG549408|-|UniRef100_Q9SH40 Cluster: Cysteine-rich repeat secretory protein 8 precursor; n=1; Arabidopsis thaliana|Rep:, partial (3%)|-|134-151|#|	-0.249873	0.95972	-0.472751	0.781456	-0.902995	0.438766	-1.16629	0.326647	-1.08708	0.699757	-3.34774	0.144169	-0.162237	1	-2.28662	0.029359	-2.45371	0.0100818	2.84	0	4.79	1.42	1.93	5.63	3.69	0	0	0	5.83	3.05	2.66	0	0	0	1.84	5.08	0	0	2.32	5.81	4.31	0	6.84	0	0	0
StET016988	GGAACTAATAATCATCT	FG549408	FG549408|-|UniRef100_Q9SH40 Cluster: Cysteine-rich repeat secretory protein 8 precursor; n=1; Arabidopsis thaliana|Rep:, partial (3%)|-|134-151|#|	-0.250387	1	-0.719636	0.779101	-1.62287	0.077386	-2.09836	0.00393192	-1.90484	0.00133318	-4.12531	6.94738e-05	-0.786923	0.538697	-1.62826	0.0123621	-2.39661	0.0193023	5.27	0	14.38	3.56	0	3.76	6.46	0	2.51	3.59	6.66	8.54	3.32	0	0	0	2.77	9.44	0	7.73	4.64	12.79	7.76	6.71	17.1	0	2.52	0
StET004617	AGAACGAATAATCATCT	FG549408	FG549408|-|UniRef100_Q9SH40 Cluster: Cysteine-rich repeat secretory protein 8 precursor; n=1; Arabidopsis thaliana|Rep:, partial (3%)|-|134-151|#|	-0.170953	1	-1.2755	0.468056	-1.42967	0.0776822	-2.13256	0.000315957	-1.70346	0.257147	-3.14297	0.00605477	-0.573174	0.759921	-1.66219	0.000339898	-2.27976	0.0455022	4.16	0	3.2	0	7.73	0	11.08	1.61	2.51	1.8	5.83	8.54	2.66	0	0	0	0	2.91	2.73	6.19	6.96	3.49	8.62	5.87	10.26	0	0	0
StET006255	ATAAATTCAAGAGGAAT	FG549408	FG549408|-|UniRef100_Q9SH40 Cluster: Cysteine-rich repeat secretory protein 8 precursor; n=1; Arabidopsis thaliana|Rep:, partial (3%)|-|113-129|#|	-0.487278	0.888239	-1.19838	0.461483	-1.49304	0.0023012	-2.0392	2.86514e-05	-1.07937	0.72642	-2.92969	6.02785e-06	-0.578049	0.650023	-1.58877	3.15587e-07	-2.08917	0.0422223	6.18	0	10.39	1.42	4.83	7.51	13.85	0	5.03	3.59	9.99	7.93	1.33	0	0	0	0	7.99	2.73	12.37	9.27	6.98	11.21	10.06	11.97	3.54	2.52	0
StET003977	ACCATTAGAGCTTATTT	GH640256	GH640256|-|NA|-|143-160|#|	2.02617	0.482959	3.53283	0.153489	0.589664	0.87751	1.65581	0.276097	-3.08062	0.0772066	1.1295	0.703472	-1.7642	0.38056	-2.86377	0.0298573	-4.63294	1.50335662420210e-07	8.43	0	0	0	0	0	0	9.67	0	0	0	0	11.3	4.74	0	66.99	0	2.91	0	0	0	0	0	9.22	6.84	0	5.89	0
StET001068	AAATTGTAGCAACAAAA	TC194777	TC194777|-|UniRef100_Q5QJA7 Cluster: Harpin binding protein 1; n=1; Solanum tuberosum|Rep: Harpin binding protein 1 - Solanum tuberosum (Potato), complete|-|921-937|#|	1.76659	0.608659	3.30487	0.165698	-1.02237	0.65359	-0.0843999	1	-4.21572	0.00856602	-3.31813	0.153531	-0.993633	0.742752	-2.98687	0.0364728	-4.00795	8.48851522753474e-05	2.93	0	0	0	0	0	0	0	0	0	19.15	0	0	9.48	0	0	0	2.18	40.97	0	0	0	0	0	8.55	0	0	0
StET016123	GCAGGAAGTAGATAGAG	TC195575	TC195575|-|similar to UniRef100_A7P2M9 Cluster: Chromosome chr1 scaffold_5, whole genome shotgun sequence; n=1; Vitis vinifera|Rep: Chromosome chr1 scaffold_5, whole genome shotgun sequence - Vitis vinifera (Grape), partial (84%)|-|908-924|#|TC212855|-|similar to UniRef100_A7P2M9 Cluster: Chromosome chr1 scaffold_5, whole genome shotgun sequence; n=1; Vitis vinifera|Rep: Chromosome chr1 scaffold_…	0.295466	1	1.53552	0.48896	2.8634	0.126199	1.84705	0.175994	-1.9503	0.0702354	-0.814492	0.475332	-0.158269	1	-3.08597	4.62099e-05	-3.24692	1.21290675536184e-05	2.51	0	0	0	0	0	0	0	0	0	0	0	2.66	0	0	0	0	0	10.92	0	0	0	0	0	0	14.75	0	0
StET015224	GATCCATATCATCGGAT	TC195879	TC195879|-|homologue to UniRef100_P07369 Cluster: Chlorophyll a-b binding protein 3C, chloroplast precursor; n=1; Solanum lycopersicum|Rep: Chlorophyll a-b binding protein 3C, chloroplast precursor - Solanum lycopersicum (Tomato) (Lycopersicon esculentum), complete|-|1013-1030|#|TC199053|-|UniRef100_P26575 Cluster: Ribulose bisphosphate carboxylase small chain 2A, chloroplast precursor; n=1; Sola…	0.165902	0.971471	0.164773	1	-0.755232	0.367006	-1.47287	0.112409	-0.7588	0.849367	-1.81213	0.0215699	-0.610823	0.350286	-1.05676	0.0183509	-1.65041	2.72978991820773e-05	6.69	0	6.39	7.83	5.8	5.63	7.39	0	11.31	9.88	6.66	10.37	1.33	2.37	0	1.84	4.61	7.26	17.3	13.92	17.39	8.14	6.9	5.03	8.55	2.95	2.52	0
StET015243	GATCCGTAGCATCGGAT	TC195879	TC195879|-|homologue to UniRef100_P07369 Cluster: Chlorophyll a-b binding protein 3C, chloroplast precursor; n=1; Solanum lycopersicum|Rep: Chlorophyll a-b binding protein 3C, chloroplast precursor - Solanum lycopersicum (Tomato) (Lycopersicon esculentum), complete|-|1013-1030|#|TC199053|-|UniRef100_P26575 Cluster: Ribulose bisphosphate carboxylase small chain 2A, chloroplast precursor; n=1; Sola…	-0.132882	1	0.00262713	1	-0.344542	0.770301	-1.38	0.0892766	-0.774519	0.52136	-2.69551	1.33521e-05	-0.378874	0.690219	-1.28959	0.000940011	-1.63422	0.00136512	8.3	3.39	7.19	11.39	6.76	3.76	13.85	0	6.28	7.19	11.65	11.58	5.32	0	0	0	5.53	9.44	22.76	9.28	9.27	9.3	9.48	10.06	18.81	4.13	2.52	4.21
StET015248	GATCCGTATCATAGGAT	TC195879	TC195879|-|homologue to UniRef100_P07369 Cluster: Chlorophyll a-b binding protein 3C, chloroplast precursor; n=1; Solanum lycopersicum|Rep: Chlorophyll a-b binding protein 3C, chloroplast precursor - Solanum lycopersicum (Tomato) (Lycopersicon esculentum), complete|-|1013-1030|#|TC199053|-|UniRef100_P26575 Cluster: Ribulose bisphosphate carboxylase small chain 2A, chloroplast precursor; n=1; Sola…	-0.298693	0.893314	-0.187846	1	-0.70682	0.473495	-1.90153	0.0184575	-0.651591	0.680506	-1.4063	1.74902e-05	-0.332123	0.81375	-1.24754	0.0256211	-1.55609	0.037805	19.19	10.16	31.96	14.24	14.49	9.39	35.09	6.45	13.83	17.97	17.48	22.56	15.29	0	8.43	3.67	13.83	26.15	39.15	20.1	33.62	30.23	15.52	12.58	41.05	7.67	8.41	6.32
StET003573	ACAATAAAATAAAGCAG	TC195896	TC195896|-|homologue to UniRef100_P09043 Cluster: Glyceraldehyde-3-phosphate dehydrogenase A, chloroplast precursor; n=1; Nicotiana tabacum|Rep: Glyceraldehyde-3-phosphate dehydrogenase A, chloroplast precursor - Nicotiana tabacum (Common tobacco), partial (97%)|-|1336-1353|#|	-0.0321576	1	-0.171598	0.983795	-1.43696	0.055461	-2.26622	0.00212098	-1.32498	0.0246395	-3.20468	0.00137758	-1.10375	0.343345	-1.13151	0.0363416	-2.27079	0.000672448	3.26	0	4	1.42	0	3.76	6.46	0	0	3.59	1.66	7.32	1.99	0	0	0	2.77	4.36	3.64	3.09	4.64	10.46	7.76	8.38	3.42	1.77	1.68	0
StET000312	AAAATAAAATAACGCAG	TC195896	TC195896|-|homologue to UniRef100_P09043 Cluster: Glyceraldehyde-3-phosphate dehydrogenase A, chloroplast precursor; n=1; Nicotiana tabacum|Rep: Glyceraldehyde-3-phosphate dehydrogenase A, chloroplast precursor - Nicotiana tabacum (Common tobacco), partial (97%)|-|1336-1353|#|	-0.13197	1	-0.0760034	1	-1.42013	0.0210088	-1.6066	0.0078916	-1.56664	0.0867584	-2.34313	0.0294183	-0.502875	0.543958	-1.30761	0.0186983	-1.7758	0.0361589	4.04	0	10.39	2.85	1.93	3.76	5.54	0	3.77	1.8	5.83	7.93	3.32	0	0	0	3.69	5.08	10.01	6.19	5.8	9.3	6.9	4.19	8.55	2.95	1.68	0
StET000302	AAAATAAAAGAAAGCAG	TC195896	TC195896|-|homologue to UniRef100_P09043 Cluster: Glyceraldehyde-3-phosphate dehydrogenase A, chloroplast precursor; n=1; Nicotiana tabacum|Rep: Glyceraldehyde-3-phosphate dehydrogenase A, chloroplast precursor - Nicotiana tabacum (Common tobacco), partial (97%)|-|1336-1353|#|	-0.201567	1	-0.425363	0.889063	-0.655139	0.474008	-1.98453	0.000918524	-0.832969	0.160374	-3.71245	2.61584e-05	0.0616409	1	-1.50921	6.3135e-05	-1.46242	0.03259	5.78	3.39	7.99	4.98	7.73	3.76	14.78	1.61	5.03	3.59	6.66	14.63	4.65	0	4.22	0	3.69	7.99	11.83	3.09	8.11	6.98	9.48	7.55	6.84	4.13	0	0
StET021657	TACTAATAGAATTCTAA	TC196074	TC196074|-|homologue to UniRef100_P12360 Cluster: Chlorophyll a-b binding protein 6A, chloroplast precursor; n=1; Solanum lycopersicum|Rep: Chlorophyll a-b binding protein 6A, chloroplast precursor - Solanum lycopersicum (Tomato) (Lycopersicon esculentum), complete|-|866-883|#|TC212556|-|homologue to UniRef100_P12360 Cluster: Chlorophyll a-b binding protein 6A, chloroplast precursor; n=1; Solanum…	0.00726518	1	0.18566	1	-0.601924	0.453965	-0.380682	0.777628	-0.557247	0.767732	-1.41351	0.210321	0.23244	1	-2.02077	0.00584122	-1.79066	0.0294154	5.04	6.78	1.6	4.27	5.8	0	9.24	1.61	2.51	6.29	4.16	6.1	7.31	0	10.54	3.67	3.69	6.54	8.19	0	3.48	5.81	4.31	2.52	8.55	4.13	0	0
StET010947	CCAAGCTTTTTAATGAG	TC196160	TC196160|-|UniRef100_P46300 Cluster: 40S ribosomal protein S4; n=1; Solanum tuberosum|Rep: 40S ribosomal protein S4 - Solanum tuberosum (Potato), complete|-|1003-1020|#|	0.240454	0.814457	-0.0816079	0.94186	-0.2096	0.808786	0.223423	0.632942	0.992586	6.66553e-05	0.580809	0.225231	0.213815	0.629453	0.804715	0.000372011	1.01958	0.00377679	246.94	262.55	236.54	286.96	283.12	411.19	198.56	434.52	299.14	466.25	158.99	228.64	351.1	291.44	278.23	363.42	327.41	198.31	135.65	334.01	215.61	262.76	193.98	262.4	186.41	355.72	255.71	65.31
StET025200	TGAATTGAACAAGAAAC	TC196776	TC196776|-|NA|-|882-898|#|	1.10024	0.703621	-1.0129	0.661553	-0.197162	1	2.12494	0.276404	-1.76129	0.610594	-3.56877	0.0265663	1.10394	0.571654	-4.08808	6.61136e-08	-3.02619	0.0036133	2.76	0	7.99	0	0	0	0	12.09	0	0	0	8.54	5.32	0	0	0	0	1.45	0	0	0	0	0	0	0	0	0	0
StET029156	TTGTTATGTTGGATGTA	TC197505	TC197505|-|homologue to UniRef100_Q9SXR9 Cluster: LeArcA1 protein; n=1; Solanum lycopersicum|Rep: LeArcA1 protein - Solanum lycopersicum (Tomato) (Lycopersicon esculentum), complete|-|1139-1156|#|	2.77413	0.242439	0.0341864	1	-0.197162	1	2.99301	0.067108	-3.60658	0.357564	-2.65574	0.875774	0.0640769	1	-3.27657	0.0363416	-3.19851	0.0437771	2.93	0	1.6	0	0	0	0	14.51	0	30.54	0	0	3.32	0	0	0	0	1.45	0	0	0	0	0	0	0	0	0	0
StET001201	AACACAACAATGTTCTC	TC197777	TC197777|-|homologue to UniRef100_Q852T2 Cluster: Vacuolar processing enzyme-1b; n=1; Nicotiana tabacum|Rep: Vacuolar processing enzyme-1b - Nicotiana tabacum (Common tobacco), partial (58%)|-|276-292|#|TC202059|-|similar to UniRef100_Q852T2 Cluster: Vacuolar processing enzyme-1b; n=1; Nicotiana tabacum|Rep: Vacuolar processing enzyme-1b - Nicotiana tabacum (Common tobacco), partial (71%)|-|455-4…	3.98429	0.172484	5.07326	0.0356785	3.79581	0.0529765	2.76792	0.114177	-0.407935	1	-2.99246	0.988583	-0.158269	1	-3.6311	0.0280133	-3.7461	0.0395009	12.15	0	0	0	0	0	0	86.26	15.08	0	0	0	3.99	21.32	71.67	138.58	0	3.63	0	0	0	0	0	0	0	0	0	0
StET000888	AAATCCAGAAAGGTATT	TC198425	TC198425|-|homologue to UniRef100_Q0WL17 Cluster: Cullin 3-like protein; n=1; Arabidopsis thaliana|Rep: Cullin 3-like protein - Arabidopsis thaliana (Mouse-ear cress), partial (30%)|-|496-513|#|	0.432085	1	2.60631	0.234507	0.239248	1	-1.36084	0.308011	-1.06099	0.993711	-1.85613	1	-1.21168	0.619528	-3.37623	0.0480457	-4.47085	0.00981773	3.27	0	0	0	0	0	0	0	0	0	0	3.66	0	0	0	0	17.52	0	14.57	0	0	0	0	6.71	0	8.85	0	0
StET021040	TAATGTCATTTTTTGAT	TC198430	TC198430|-|homologue to UniRef100_P17340 Cluster: Plastocyanin, chloroplast precursor; n=1; Solanum lycopersicum|Rep: Plastocyanin, chloroplast precursor - Solanum lycopersicum (Tomato) (Lycopersicon esculentum), complete|-|1517-1534|#|TC200918|-|homologue to UniRef100_Q0W9E5 Cluster: Plastocyanin; n=1; Solanum commersonii|Rep: Plastocyanin - Solanum commersonii (Commerson's wild potato), partial…	0.741581	0.822622	0.148146	1	-1.33519	0.116172	-1.70023	0.0661972	-0.775437	0.777078	-2.58191	0.0293328	-1.15254	0.338357	-1.67885	0.00980038	-2.82391	1.90363974905521e-05	2.86	0	4	0	0	3.76	1.85	0	0	4.49	2.5	7.93	1.99	0	0	0	1.84	4.36	1.82	10.82	5.8	2.33	4.31	3.35	0	2.95	0	0
StET020927	TAATGACATTTTGTGAT	TC198430	TC198430|-|homologue to UniRef100_P17340 Cluster: Plastocyanin, chloroplast precursor; n=1; Solanum lycopersicum|Rep: Plastocyanin, chloroplast precursor - Solanum lycopersicum (Tomato) (Lycopersicon esculentum), complete|-|1517-1534|#|TC200918|-|homologue to UniRef100_Q0W9E5 Cluster: Plastocyanin; n=1; Solanum commersonii|Rep: Plastocyanin - Solanum commersonii (Commerson's wild potato), partial…	0.151578	1	-0.364406	0.884134	-0.733685	0.284949	-1.9325	0.00120572	-0.943799	0.650626	-2.12826	0.013066	-0.552948	0.633575	-1.8049	0.000285235	-2.37786	0.00641192	15.09	0	16.78	7.12	16.43	9.39	21.24	2.42	7.54	8.09	17.48	31.7	10.64	2.37	0	4.59	15.68	18.16	10.01	17.01	25.5	8.14	18.97	19.28	22.23	11.8	10.94	4.21
StET021039	TAATGTCATTTTGTTAT	TC198430	TC198430|-|homologue to UniRef100_P17340 Cluster: Plastocyanin, chloroplast precursor; n=1; Solanum lycopersicum|Rep: Plastocyanin, chloroplast precursor - Solanum lycopersicum (Tomato) (Lycopersicon esculentum), complete|-|1517-1534|#|TC200918|-|homologue to UniRef100_Q0W9E5 Cluster: Plastocyanin; n=1; Solanum commersonii|Rep: Plastocyanin - Solanum commersonii (Commerson's wild potato), partial…	-0.388091	0.955059	-0.133012	1	-0.898347	0.167856	-1.28471	0.0569271	-1.06918	0.600401	-1.71993	0.0767508	-0.548314	0.662207	-1.68539	0.00242376	-2.24682	0.000465809	3.51	0	4.79	2.14	1.93	0	6.46	0	0	3.59	2.5	6.1	0	0	0	0	0	7.26	3.64	9.28	4.64	2.33	3.45	5.03	6.84	3.54	2.52	0
StET020972	TAATGGCATTTTGTGAT	TC198430	TC198430|-|homologue to UniRef100_P17340 Cluster: Plastocyanin, chloroplast precursor; n=1; Solanum lycopersicum|Rep: Plastocyanin, chloroplast precursor - Solanum lycopersicum (Tomato) (Lycopersicon esculentum), complete|-|1517-1534|#|TC200918|-|homologue to UniRef100_Q0W9E5 Cluster: Plastocyanin; n=1; Solanum commersonii|Rep: Plastocyanin - Solanum commersonii (Commerson's wild potato), partial…	0.0049393	1	-0.590828	0.726463	-1.18927	0.0536503	-1.88146	1.12538e-05	-1.11443	0.616064	-3.39676	2.81688e-05	-0.504542	0.545727	-1.57386	2.18215e-05	-2.10584	0.00912802	18.52	5.08	30.37	8.54	31.89	13.14	17.55	4.84	17.6	17.07	14.15	32.31	16.62	2.37	4.22	8.26	9.22	26.88	12.75	21.65	22.02	24.42	25.86	30.18	29.07	13.57	7.57	6.32
StET021023	TAATGTCATGTTGTGAT	TC198430	TC198430|-|homologue to UniRef100_P17340 Cluster: Plastocyanin, chloroplast precursor; n=1; Solanum lycopersicum|Rep: Plastocyanin, chloroplast precursor - Solanum lycopersicum (Tomato) (Lycopersicon esculentum), complete|-|1517-1534|#|TC200918|-|homologue to UniRef100_Q0W9E5 Cluster: Plastocyanin; n=1; Solanum commersonii|Rep: Plastocyanin - Solanum commersonii (Commerson's wild potato), partial…	-0.606778	0.835135	-1.19497	0.385175	-0.389519	0.842397	-1.28425	0.18224	-0.668026	0.739928	-2.09337	0.114256	0.242855	0.931346	-2.16613	0.00126166	-1.95735	0.0289619	2.72	0	4.79	0	4.83	0	6.46	1.61	3.77	0	0	3.66	2.66	0	0	0	1.84	2.18	0	3.09	2.32	0	5.17	2.52	3.42	1.18	0	0
StET021030	TAATGTCATTTTGCGAT	TC198430	TC198430|-|homologue to UniRef100_P17340 Cluster: Plastocyanin, chloroplast precursor; n=1; Solanum lycopersicum|Rep: Plastocyanin, chloroplast precursor - Solanum lycopersicum (Tomato) (Lycopersicon esculentum), complete|-|1517-1534|#|TC200918|-|homologue to UniRef100_Q0W9E5 Cluster: Plastocyanin; n=1; Solanum commersonii|Rep: Plastocyanin - Solanum commersonii (Commerson's wild potato), partial…	-0.0216154	1	-0.915471	0.496751	-1.21665	0.0536503	-1.88161	0.00443459	-1.00309	0.655686	-3.13801	0.0194575	-0.630927	0.489012	-1.30725	0.0104828	-1.95507	0.0305366	22.35	5.08	39.16	12.82	30.92	13.14	27.71	7.26	20.11	23.36	28.3	31.1	15.29	2.37	4.22	6.42	21.21	18.16	11.83	32.47	31.3	22.09	40.52	31.02	46.18	16.52	12.62	12.64
StET021022	TAATGTCATCTTGTGAT	TC198430	TC198430|-|homologue to UniRef100_P17340 Cluster: Plastocyanin, chloroplast precursor; n=1; Solanum lycopersicum|Rep: Plastocyanin, chloroplast precursor - Solanum lycopersicum (Tomato) (Lycopersicon esculentum), complete|-|1517-1534|#|TC200918|-|homologue to UniRef100_Q0W9E5 Cluster: Plastocyanin; n=1; Solanum commersonii|Rep: Plastocyanin - Solanum commersonii (Commerson's wild potato), partial…	-0.39703	0.870683	-0.965544	0.436397	-0.913993	0.134705	-2.20541	8.88293e-05	-0.822858	0.312436	-2.12133	0.00129552	-0.414771	0.711752	-1.41678	0.00422072	-1.8183	0.0123645	7.47	3.39	15.18	3.56	8.7	3.76	12.01	1.61	7.54	6.29	7.49	9.15	3.99	0	0	3.67	3.69	7.99	3.64	17.01	11.59	9.3	6.9	6.71	17.1	5.9	5.05	0
StET020666	TAAGGTCATTTTGTGAT	TC198430	TC198430|-|homologue to UniRef100_P17340 Cluster: Plastocyanin, chloroplast precursor; n=1; Solanum lycopersicum|Rep: Plastocyanin, chloroplast precursor - Solanum lycopersicum (Tomato) (Lycopersicon esculentum), complete|-|1517-1534|#|TC200918|-|homologue to UniRef100_Q0W9E5 Cluster: Plastocyanin; n=1; Solanum commersonii|Rep: Plastocyanin - Solanum commersonii (Commerson's wild potato), partial…	-0.00897895	1	-0.696304	0.626234	-0.757878	0.349072	-1.11462	0.132466	-0.240582	1	-1.90925	0.023292	-0.527289	0.656641	-1.25439	0.00379316	-1.76333	0.00049697	5.68	0	4.79	4.27	12.56	3.76	3.69	0	0	3.59	9.16	6.71	7.31	0	0	3.67	1.84	3.63	5.46	7.73	8.11	4.65	10.35	4.19	11.97	4.72	1.68	0
StET021027	TAATGTCATTTCGTGAT	TC198430	TC198430|-|homologue to UniRef100_P17340 Cluster: Plastocyanin, chloroplast precursor; n=1; Solanum lycopersicum|Rep: Plastocyanin, chloroplast precursor - Solanum lycopersicum (Tomato) (Lycopersicon esculentum), complete|-|1517-1534|#|TC200918|-|homologue to UniRef100_Q0W9E5 Cluster: Plastocyanin; n=1; Solanum commersonii|Rep: Plastocyanin - Solanum commersonii (Commerson's wild potato), partial…	-0.303449	0.855398	-1.07497	0.306501	-1.38249	0.0413974	-1.97753	0.000516239	-0.928578	0.750213	-1.73691	0.127174	-0.323396	0.792535	-1.16621	0.0205325	-1.50625	0.0174552	7.66	3.39	15.98	4.98	11.6	11.27	7.39	4.84	10.06	6.29	9.99	8.54	4.65	0	0	3.67	2.77	8.72	4.55	6.19	11.59	6.98	14.66	14.25	13.68	7.08	1.68	4.21
StET009190	ATTTTGCTATCATTAGG	TC198553	TC198553|-|homologue to UniRef100_Q93XV7 Cluster: Hydroxypyruvate reductase; n=1; Bruguiera gymnorhiza|Rep: Hydroxypyruvate reductase - Bruguiera gymnorhiza, partial (58%)|-|769-786|#|TC199107|-|homologue to UniRef100_Q93XV7 Cluster: Hydroxypyruvate reductase; n=1; Bruguiera gymnorhiza|Rep: Hydroxypyruvate reductase - Bruguiera gymnorhiza, complete|-|1277-1294|#|	0.565957	0.7838	-0.433544	0.828118	-0.301266	0.916699	-1.02759	0.296643	-0.990385	0.364666	-1.99824	0.0807106	-0.281015	0.945594	-1.33249	0.0137442	-1.60075	0.00468573	4.08	0	2.4	4.98	3.87	0	8.31	1.61	6.28	8.09	4.16	10.97	3.99	0	0	4.59	2.77	2.18	4.55	0	3.48	5.81	2.59	9.22	6.84	4.13	0	0
StET014565	GAGAAAGTTCGGTCATT	TC199069	TC199069|-|weakly similar to UniRef100_A7P5C8 Cluster: Chromosome chr4 scaffold_6, whole genome shotgun sequence; n=1; Vitis vinifera|Rep: Chromosome chr4 scaffold_6, whole genome shotgun sequence - Vitis vinifera (Grape), partial (51%)|-|1266-1283|#|TC204825|-|weakly similar to UniRef100_Q6A4W8 Cluster: Glutathione peroxidase; n=1; Malus x domestica|Rep: Glutathione peroxidase - Malus domestica …	0.487144	0.924441	-0.897548	0.679393	1.18015	0.613171	-1.61258	0.240441	-1.80977	0.530156	-3.57055	0.000143306	0.301948	1	-2.71995	0.00320998	-2.43132	0.0399334	3.19	0	11.99	0	0	0	2.77	3.22	0	0	5.83	14.02	1.33	0	0	0	0	4.36	0	0	0	0	0	9.22	0	0	0	10.53
StET015199	GATCAGATTCATTGGAT	TC199118	TC199118|-|homologue to UniRef100_P26574 Cluster: Ribulose bisphosphate carboxylase small chain 1, chloroplast precursor; n=1; Solanum tuberosum|Rep: Ribulose bisphosphate carboxylase small chain 1, chloroplast precursor - Solanum tuberosum (Potato), complete|-|520-537|#|TC199887|-|UniRef100_P26574 Cluster: Ribulose bisphosphate carboxylase small chain 1, chloroplast precursor; n=1; Solanum tuber…	0.142929	1	0.330294	0.96303	-0.720087	0.504523	-1.36095	0.0718042	-1.14223	0.156205	-2.39891	0.000182672	-0.570237	0.55118	-1.63663	5.72281e-06	-2.23025	0.00892072	21.34	8.47	32.76	3.56	19.33	15.02	24.01	7.26	12.57	12.58	27.47	25	25.27	0	0	15.6	6.46	22.52	66.46	40.2	33.62	16.28	24.14	24.31	20.52	9.44	8.41	8.43
StET015180	GATCAGAATCATTGAAT	TC199118	TC199118|-|homologue to UniRef100_P26574 Cluster: Ribulose bisphosphate carboxylase small chain 1, chloroplast precursor; n=1; Solanum tuberosum|Rep: Ribulose bisphosphate carboxylase small chain 1, chloroplast precursor - Solanum tuberosum (Potato), complete|-|520-537|#|TC199887|-|UniRef100_P26574 Cluster: Ribulose bisphosphate carboxylase small chain 1, chloroplast precursor; n=1; Solanum tuber…	0.00593418	1	-0.09226	1	-1.07894	0.0539892	-2.0845	1.77765e-06	-1.31703	0.461856	-2.90921	0.0388315	-0.381246	0.777329	-1.74257	0.00645295	-2.14697	0.0489107	14.45	0	21.58	7.83	14.49	15.02	21.24	2.42	22.62	8.98	19.15	17.68	11.97	0	10.54	8.26	6.46	15.98	29.13	26.29	22.02	25.58	10.35	16.77	11.97	10.62	9.25	4.21
StET015202	GATCAGCATCATTGGAT	TC199118	TC199118|-|homologue to UniRef100_P26574 Cluster: Ribulose bisphosphate carboxylase small chain 1, chloroplast precursor; n=1; Solanum tuberosum|Rep: Ribulose bisphosphate carboxylase small chain 1, chloroplast precursor - Solanum tuberosum (Potato), complete|-|520-537|#|TC199887|-|UniRef100_P26574 Cluster: Ribulose bisphosphate carboxylase small chain 1, chloroplast precursor; n=1; Solanum tuber…	-0.0318556	1	0.190992	1	-0.48301	0.742957	-1.35227	0.120357	-1.61124	0.00097711	-3.26855	0.000140157	-0.372923	0.756996	-1.70833	3.34292e-05	-2.0821	0.0105676	46.77	15.25	87.9	21.36	34.79	37.55	58.18	8.06	36.45	56.6	64.1	58.53	23.27	4.74	6.32	13.77	22.13	67.56	141.11	78.86	35.93	79.06	36.21	51.14	59.86	29.5	10.94	29.49
StET015171	GATCAGAATAATTGGAT	TC199118	TC199118|-|homologue to UniRef100_P26574 Cluster: Ribulose bisphosphate carboxylase small chain 1, chloroplast precursor; n=1; Solanum tuberosum|Rep: Ribulose bisphosphate carboxylase small chain 1, chloroplast precursor - Solanum tuberosum (Potato), complete|-|520-537|#|TC199887|-|UniRef100_P26574 Cluster: Ribulose bisphosphate carboxylase small chain 1, chloroplast precursor; n=1; Solanum tuber…	-0.121594	1	0.0441403	1	-1.40561	0.0356352	-1.53113	0.0774743	-0.865994	0.294839	-2.68586	0.000435641	-0.447959	0.681299	-1.4987	0.00174392	-1.94439	0.0100818	34.66	11.86	58.33	16.38	26.09	37.55	45.25	7.26	28.91	34.14	33.3	43.9	28.59	0	18.97	11.01	25.82	43.58	82.84	80.41	60.28	48.83	22.42	26.83	42.76	13.57	15.98	16.85
StET010566	CATCAGAATCATTGGAT	TC199118	TC199118|-|homologue to UniRef100_P26574 Cluster: Ribulose bisphosphate carboxylase small chain 1, chloroplast precursor; n=1; Solanum tuberosum|Rep: Ribulose bisphosphate carboxylase small chain 1, chloroplast precursor - Solanum tuberosum (Potato), complete|-|520-537|#|TC199887|-|UniRef100_P26574 Cluster: Ribulose bisphosphate carboxylase small chain 1, chloroplast precursor; n=1; Solanum tuber…	-0.656743	0.704229	-0.252373	0.989401	-0.914819	0.22807	-1.16971	0.091637	-0.434059	0.703552	-2.42957	0.00258825	0.0891921	1	-1.9714	0.00106563	-1.87805	0.0182309	9.16	3.39	14.38	4.98	9.66	7.51	18.47	2.42	8.8	4.49	2.5	8.54	9.97	0	0	0	6.46	11.62	21.85	13.92	3.48	18.6	6.04	6.71	10.26	8.85	5.05	0
StET015179	GATCAGAATCATTCGAT	TC199118	TC199118|-|homologue to UniRef100_P26574 Cluster: Ribulose bisphosphate carboxylase small chain 1, chloroplast precursor; n=1; Solanum tuberosum|Rep: Ribulose bisphosphate carboxylase small chain 1, chloroplast precursor - Solanum tuberosum (Potato), complete|-|520-537|#|TC199887|-|UniRef100_P26574 Cluster: Ribulose bisphosphate carboxylase small chain 1, chloroplast precursor; n=1; Solanum tuber…	0.0518789	1	-0.232123	0.981709	-1.19058	0.0764446	-1.6641	0.096895	-0.788539	0.344038	-1.84576	4.00444e-05	-0.679707	0.53965	-1.17813	0.0358267	-1.86123	0.0461814	15.67	0	19.18	7.83	14.49	15.02	24.93	4.03	21.37	11.68	12.49	21.95	14.63	2.37	8.43	3.67	6.46	18.16	26.4	49.48	28.98	16.28	14.66	20.12	13.68	14.16	6.73	8.43
StET015194	GATCAGAATCTTTGGAT	TC199118	TC199118|-|homologue to UniRef100_P26574 Cluster: Ribulose bisphosphate carboxylase small chain 1, chloroplast precursor; n=1; Solanum tuberosum|Rep: Ribulose bisphosphate carboxylase small chain 1, chloroplast precursor - Solanum tuberosum (Potato), complete|-|520-537|#|TC199887|-|UniRef100_P26574 Cluster: Ribulose bisphosphate carboxylase small chain 1, chloroplast precursor; n=1; Solanum tuber…	-0.225358	0.970624	-0.100545	1	-1.53566	0.0464015	-1.65571	0.0190295	-0.997634	0.0822809	-2.6738	0.000118922	-0.701222	0.429687	-1.06092	0.0246526	-1.76294	0.0456804	30.02	11.86	47.15	12.82	20.29	30.04	49.87	4.03	13.83	30.54	34.13	37.19	24.6	5.92	16.86	11.93	28.59	31.24	56.44	66.49	42.89	61.62	26.73	36.89	58.15	20.06	8.41	12.64
StET014994	GATAAGAATCATTGGAT	TC199118	TC199118|-|homologue to UniRef100_P26574 Cluster: Ribulose bisphosphate carboxylase small chain 1, chloroplast precursor; n=1; Solanum tuberosum|Rep: Ribulose bisphosphate carboxylase small chain 1, chloroplast precursor - Solanum tuberosum (Potato), complete|-|520-537|#|TC199887|-|UniRef100_P26574 Cluster: Ribulose bisphosphate carboxylase small chain 1, chloroplast precursor; n=1; Solanum tuber…	-0.357133	0.889676	-0.293754	0.946122	-1.23461	0.0651918	-1.83301	0.0387008	-0.966324	0.335087	-2.34955	0.0143547	-0.379659	0.715291	-1.38157	0.00345048	-1.76246	0.0366957	28.77	16.94	51.94	9.97	27.06	30.04	45.25	4.84	15.08	17.97	39.12	39.02	21.28	3.55	4.22	13.77	25.82	29.06	58.26	46.39	33.62	37.21	28.45	37.73	58.15	18.29	30.28	4.21
StET015193	GATCAGAATCGTTGGAT	TC199118	TC199118|-|homologue to UniRef100_P26574 Cluster: Ribulose bisphosphate carboxylase small chain 1, chloroplast precursor; n=1; Solanum tuberosum|Rep: Ribulose bisphosphate carboxylase small chain 1, chloroplast precursor - Solanum tuberosum (Potato), complete|-|520-537|#|TC199887|-|UniRef100_P26574 Cluster: Ribulose bisphosphate carboxylase small chain 1, chloroplast precursor; n=1; Solanum tuber…	-0.152202	0.975035	-0.207636	0.946346	-1.46198	0.0390694	-1.78088	0.0258515	-0.961972	0.165117	-2.26787	3.78827e-07	-0.327232	0.702171	-0.971728	0.00964669	-1.30787	0.0459496	37.26	22.02	79.91	24.21	43.48	41.31	44.33	12.9	41.48	49.41	41.62	52.43	27.26	8.29	29.51	18.35	35.05	41.41	72.83	86.6	71.87	58.13	36.21	39.4	41.05	15.93	16.82	16.85
StET010215	CAGCAAAGACAAAGAAC	TC199524	TC199524|-|homologue to UniRef100_Q672Q6 Cluster: Photosystem II oxygen-evolving complex protein 3 precursor; n=1; Solanum lycopersicum|Rep: Photosystem II oxygen-evolving complex protein 3 precursor - Solanum lycopersicum (Tomato) (Lycopersicon esculentum), complete|-|680-697|#|TC205044|-|homologue to UniRef100_Q672Q6 Cluster: Photosystem II oxygen-evolving complex protein 3 precursor; n=1; Sola…	-0.555808	0.633934	-0.0443645	1	-0.987162	0.340236	-1.22505	0.117789	-1.01396	0.382779	-1.91402	0.0168976	-0.050617	1	-1.47753	0.0284409	-1.51751	0.0133863	8.08	10.16	11.99	4.27	12.56	3.76	12.93	7.26	3.77	8.98	7.49	7.32	2.66	0	10.54	7.34	6.46	12.35	13.66	4.64	5.8	15.11	14.66	5.87	11.97	10.03	0	0
StET030789	TTTTTTCTCTAGTTATA	TC199975	TC199975|-|homologue to UniRef100_Q41229 Cluster: Photosystem I reaction center subunit IV B, chloroplast precursor (PSI-E B) [Contains: Photosystem I reaction center subunit IV B isoform 2]; n=3; Nicotiana sylvestris|Rep: Photosystem I reaction center subunit IV B, chloroplast precursor (PSI-E B) [Contains: Photosystem I reaction center subunit IV B isoform 2] - Nicotiana sylvestris (Wood tobacc…	0.095871	1	0.942358	0.61233	-1.40353	0.0562612	-0.817858	0.390606	-0.689409	0.673275	-2.59479	0.0181791	-1.15803	0.268414	-1.37865	0.00543009	-2.48968	0.000239386	3.65	0	4.79	0	0	3.76	3.69	0	0	3.59	1.66	3.05	4.65	0	0	4.59	3.69	3.63	11.83	4.64	5.8	5.81	5.17	6.71	5.13	1.77	0	0
StET030366	TTTTATCTCTAGATATA	TC199975	TC199975|-|homologue to UniRef100_Q41229 Cluster: Photosystem I reaction center subunit IV B, chloroplast precursor (PSI-E B) [Contains: Photosystem I reaction center subunit IV B isoform 2]; n=3; Nicotiana sylvestris|Rep: Photosystem I reaction center subunit IV B, chloroplast precursor (PSI-E B) [Contains: Photosystem I reaction center subunit IV B isoform 2] - Nicotiana sylvestris (Wood tobacc…	0.0386727	1	0.185653	0.987584	-0.807882	0.267628	-1.23211	0.114251	-1.21673	0.216514	-1.60713	0.0734708	0.107384	1	-2.09116	2.80856e-05	-1.98388	8.51840517414763e-05	5.6	3.39	3.2	7.12	6.76	3.76	9.24	1.61	2.51	8.98	8.32	6.71	5.98	0	4.22	6.42	6.46	2.91	15.48	4.64	3.48	5.81	2.59	9.22	6.84	2.95	1.68	0
StET014704	GAGCAACTCATTGTTCA	TC200512	TC200512|-|UniRef100_Q6L4B1 Cluster: EF hand family protein; n=1; Solanum demissum|Rep: EF hand family protein - Solanum demissum (Wild potato), complete|-|645-662|#|TC222329|-|UniRef100_Q6L4B1 Cluster: EF hand family protein; n=1; Solanum demissum|Rep: EF hand family protein - Solanum demissum (Wild potato), partial (10%)|-|236-253|#|	0.155547	1	-1.03354	0.580135	0.816658	0.562476	1.9885	0.169735	-0.145699	1	-3.53038	0.0589322	1.79778	0.265888	-4.06361	3.70441e-07	-2.30673	0.0388897	3.84	0	4.79	10.68	0	0	1.85	7.26	0	0	0	7.32	5.98	4.74	0	0	0	2.18	0	0	0	0	0	0	0	0	0	0
StET030812	TTTTTTGCGTTTTGAAC	TC201192	TC201192|-|UniRef100_P10647 Cluster: Ribulose bisphosphate carboxylase small chain C, chloroplast precursor; n=1; Solanum tuberosum|Rep: Ribulose bisphosphate carboxylase small chain C, chloroplast precursor - Solanum tuberosum (Potato), complete|-|640-657|#|TC216042|-|homologue to UniRef100_P10647 Cluster: Ribulose bisphosphate carboxylase small chain C, chloroplast precursor; n=1; Solanum tuber…	-0.40242	0.875394	-0.54908	0.797767	-1.73754	0.00158372	-1.43563	0.0809718	-0.830285	0.691644	-2.74058	0.0199759	-0.416383	0.689753	-1.43261	0.0241402	-1.87822	0.0424363	8.32	0	11.99	4.27	14.49	7.51	12.01	1.61	10.06	4.49	7.49	9.76	5.98	0	4.22	0	9.22	8.72	9.1	6.19	9.27	12.79	12.93	14.25	15.39	2.95	2.52	0
StET030652	TTTTTAGCGTTTTGTAC	TC201192	TC201192|-|UniRef100_P10647 Cluster: Ribulose bisphosphate carboxylase small chain C, chloroplast precursor; n=1; Solanum tuberosum|Rep: Ribulose bisphosphate carboxylase small chain C, chloroplast precursor - Solanum tuberosum (Potato), complete|-|640-657|#|TC216042|-|homologue to UniRef100_P10647 Cluster: Ribulose bisphosphate carboxylase small chain C, chloroplast precursor; n=1; Solanum tuber…	0.398677	0.814457	-1.13466	0.375077	-0.782134	0.519573	-0.869165	0.492943	-0.462232	0.850527	-2.71211	0.0546461	0.106359	1	-1.88718	0.00186828	-1.78239	0.00566605	2.52	0	6.39	1.42	1.93	3.76	2.77	3.22	3.77	4.49	2.5	4.27	4.65	0	4.22	0	0	0	1.82	4.64	0	0	5.17	2.52	0	2.36	0	4.21
StET030814	TTTTTTGCGTTTTGGAC	TC201192	TC201192|-|UniRef100_P10647 Cluster: Ribulose bisphosphate carboxylase small chain C, chloroplast precursor; n=1; Solanum tuberosum|Rep: Ribulose bisphosphate carboxylase small chain C, chloroplast precursor - Solanum tuberosum (Potato), complete|-|640-657|#|TC216042|-|homologue to UniRef100_P10647 Cluster: Ribulose bisphosphate carboxylase small chain C, chloroplast precursor; n=1; Solanum tuber…	-0.301986	0.946142	-0.972997	0.424555	-1.49048	0.0787127	-1.27494	0.289426	-0.755943	0.651849	-1.81081	0.00167007	-0.194763	0.989645	-1.48627	0.00509502	-1.68193	0.0100818	6.59	0	11.19	4.98	7.73	5.63	13.85	2.42	5.03	2.7	7.49	11.58	6.65	0	0	1.84	4.61	7.26	4.55	0	8.11	6.98	12.93	10.9	11.97	4.13	0	0
StET030803	TTTTTTGCGGTTTGTAC	TC201192	TC201192|-|UniRef100_P10647 Cluster: Ribulose bisphosphate carboxylase small chain C, chloroplast precursor; n=1; Solanum tuberosum|Rep: Ribulose bisphosphate carboxylase small chain C, chloroplast precursor - Solanum tuberosum (Potato), complete|-|640-657|#|TC216042|-|homologue to UniRef100_P10647 Cluster: Ribulose bisphosphate carboxylase small chain C, chloroplast precursor; n=1; Solanum tuber…	-0.249174	0.935841	-0.540171	0.771732	-1.36454	0.0535356	-1.30815	0.191397	-0.707116	0.670407	-1.94298	0.000337583	-0.0853663	1	-1.41353	0.000186189	-1.499	0.0175499	12.43	11.86	15.98	7.12	20.29	5.63	23.09	4.84	12.57	6.29	17.48	16.46	11.97	2.37	10.54	0	14.76	12.35	14.57	7.73	11.59	17.44	18.97	14.25	20.52	6.49	1.68	10.53
StET030270	TTTGTTGCGTTTTGTAC	TC201192	TC201192|-|UniRef100_P10647 Cluster: Ribulose bisphosphate carboxylase small chain C, chloroplast precursor; n=1; Solanum tuberosum|Rep: Ribulose bisphosphate carboxylase small chain C, chloroplast precursor - Solanum tuberosum (Potato), complete|-|640-657|#|TC216042|-|homologue to UniRef100_P10647 Cluster: Ribulose bisphosphate carboxylase small chain C, chloroplast precursor; n=1; Solanum tuber…	-0.57205	0.775224	-0.598447	0.742334	-0.855665	0.362582	-1.46279	0.0239582	-0.860733	0.691143	-3.35751	0.0011	0.077784	1	-1.3522	0.00174392	-1.3201	0.0315324	4.74	3.39	11.19	2.85	9.66	3.76	7.39	0	7.54	3.59	5.83	6.71	1.99	0	0	0	5.53	8.72	4.55	3.09	6.96	3.49	8.62	7.55	6.84	2.36	0	0
StET028856	TTGGTAGCTGATGTCCA	TC201682	TC201682|-|similar to UniRef100_O82463 Cluster: SKP1-like protein; n=1; Nicotiana clevelandii|Rep: SKP1-like protein - Nicotiana clevelandii (Wild tobacco), partial (97%)|-|748-765|#|	1.4357	0.552499	2.46673	0.271927	2.90207	0.0759408	0.586298	0.853236	-2.17815	0.337347	-2.9944	0.276872	-0.158269	1	-3.55585	0.000519117	-3.69579	0.000882062	3.02	0	0	0	0	0	0	7.26	0	0	0	0	5.32	23.69	0	0	0	7.26	0	0	0	0	0	0	0	0	12.62	0
StET001659	AAGAAATAGATTTAAAC	TC202073	TC202073|-|weakly similar to UniRef100_A7NTX6 Cluster: Chromosome chr18 scaffold_1, whole genome shotgun sequence; n=2; Vitis vinifera|Rep: Chromosome chr18 scaffold_1, whole genome shotgun sequence - Vitis vinifera (Grape), partial (16%)|-|613-630|#|	-0.0038289	1	0.739077	0.803137	1.26204	0.418867	2.11664	0.191617	-2.55794	4.66491e-10	-1.08648	0.124692	1.38066	0.496864	-4.41851	2.86068e-20	-2.98889	0.00853747	3.59	0	11.19	0	0	0	0	0	0	8.98	0	0	4.65	2.37	0	0	20.29	2.91	0	0	0	0	0	0	0	8.26	0	0
StET017541	GGCTAACATTATAGGAT	TC203029	TC203029|-|emb|X51576.1|LERRN17 Tomato 17S rRNA gene, partial (40%)|-|373-390|#|TC205622|-|gb|AF207016.1| Schizanthus pinnatus 18S ribosomal RNA gene, complete sequence, partial (24%)|-|61-78|#|TC226465|-|homologue to gb|AF207016.1| Schizanthus pinnatus 18S ribosomal RNA gene, complete sequence, partial (29%)|-|66-83|#|	-0.0351437	1	0.76298	0.543495	0.328082	0.818803	-0.00955411	1	0.241639	1	-1.11454	0.320029	-0.274306	0.924685	-1.74401	0.0391225	-1.9949	0.00300321	14.68	5.08	19.18	7.83	4.83	5.63	12.01	2.42	16.34	8.09	8.32	9.15	10.64	5.92	12.65	5.51	15.68	19.61	29.13	0	16.23	18.6	14.66	5.03	11.97	10.62	9.25	8.43
StET017269	GGATAACTTTATAGGAT	TC203029	TC203029|-|emb|X51576.1|LERRN17 Tomato 17S rRNA gene, partial (40%)|-|373-390|#|TC205622|-|gb|AF207016.1| Schizanthus pinnatus 18S ribosomal RNA gene, complete sequence, partial (24%)|-|61-78|#|TC226465|-|homologue to gb|AF207016.1| Schizanthus pinnatus 18S ribosomal RNA gene, complete sequence, partial (29%)|-|66-83|#|	0.155572	1	0.531166	0.765732	0.305125	0.730262	-0.0469405	1	-0.112974	1	-0.332848	1	-0.420993	0.720116	-1.59684	0.01208	-1.99202	0.00271912	8.3	5.08	4	4.27	3.87	7.51	7.39	0	10.06	7.19	7.49	3.05	6.65	3.55	6.32	2.75	2.77	11.62	14.57	9.28	2.32	9.3	6.9	6.71	6.84	7.67	7.57	8.43
StET017248	GGATAACATTATAAGAT	TC203029	TC203029|-|emb|X51576.1|LERRN17 Tomato 17S rRNA gene, partial (40%)|-|373-390|#|TC205622|-|gb|AF207016.1| Schizanthus pinnatus 18S ribosomal RNA gene, complete sequence, partial (24%)|-|61-78|#|TC226465|-|homologue to gb|AF207016.1| Schizanthus pinnatus 18S ribosomal RNA gene, complete sequence, partial (29%)|-|66-83|#|	-0.079725	1	0.57343	0.797767	0.165218	0.999047	-0.391017	0.894109	-0.669375	0.616159	-0.694378	0.432009	0.633273	0.744591	-2.43867	5.27785e-06	-1.88071	0.0269037	4.15	0	7.99	4.27	0	7.51	1.85	5.64	7.54	0	2.5	1.83	4.65	4.74	0	2.75	4.61	7.26	10.92	0	3.48	0	5.17	1.68	0	4.13	1.68	0
StET017250	GGATAACATTATAGAAT	TC203029	TC203029|-|emb|X51576.1|LERRN17 Tomato 17S rRNA gene, partial (40%)|-|373-390|#|TC205622|-|gb|AF207016.1| Schizanthus pinnatus 18S ribosomal RNA gene, complete sequence, partial (24%)|-|61-78|#|TC226465|-|homologue to gb|AF207016.1| Schizanthus pinnatus 18S ribosomal RNA gene, complete sequence, partial (29%)|-|66-83|#|	0.126174	1	1.2945	0.299507	0.734467	0.542022	0.230841	0.942095	-0.555861	0.653267	-0.478974	0.949096	0.244432	1	-2.04765	0.00060621	-1.80004	0.0020677	5.78	0	6.39	2.14	5.8	0	4.62	3.22	3.77	2.7	3.33	4.27	7.31	2.37	33.73	6.42	3.69	7.26	8.19	0	2.32	6.98	3.45	1.68	5.13	3.54	3.36	10.53
StET017991	GGTTAACATTATAGGAT	TC203029	TC203029|-|emb|X51576.1|LERRN17 Tomato 17S rRNA gene, partial (40%)|-|373-390|#|TC205622|-|gb|AF207016.1| Schizanthus pinnatus 18S ribosomal RNA gene, complete sequence, partial (24%)|-|61-78|#|TC226465|-|homologue to gb|AF207016.1| Schizanthus pinnatus 18S ribosomal RNA gene, complete sequence, partial (29%)|-|66-83|#|	0.309873	0.920999	0.5665	0.661553	0.323299	0.707483	-0.0949681	1	0.148289	1	-0.708426	0.460883	-0.178169	0.927449	-1.48852	0.00174392	-1.69049	0.0116694	19.53	8.47	24.77	8.54	11.6	7.51	19.39	2.42	25.14	7.19	16.65	15.85	30.59	10.66	8.43	11.01	23.06	21.07	38.24	9.28	22.02	19.77	17.24	17.61	6.84	10.03	13.46	23.17
StET017267	GGATAACCTTATAGGAT	TC203029	TC203029|-|emb|X51576.1|LERRN17 Tomato 17S rRNA gene, partial (40%)|-|373-390|#|TC205622|-|gb|AF207016.1| Schizanthus pinnatus 18S ribosomal RNA gene, complete sequence, partial (24%)|-|61-78|#|TC226465|-|homologue to gb|AF207016.1| Schizanthus pinnatus 18S ribosomal RNA gene, complete sequence, partial (29%)|-|66-83|#|	-0.437455	0.856808	0.564473	0.678948	0.55915	0.514176	0.356562	0.806077	-0.26865	1	-1.04653	0.323257	0.011124	1	-1.595	0.00953507	-1.60916	0.0459496	8.96	0	5.59	7.12	6.76	7.51	12.93	0	0	4.49	7.49	6.1	9.31	7.11	4.22	6.42	8.3	13.08	19.12	4.64	10.43	8.14	11.21	4.19	3.42	9.44	7.57	4.21
StET017304	GGATCACATTATAGGAT	TC203029	TC203029|-|emb|X51576.1|LERRN17 Tomato 17S rRNA gene, partial (40%)|-|373-390|#|TC205622|-|gb|AF207016.1| Schizanthus pinnatus 18S ribosomal RNA gene, complete sequence, partial (24%)|-|61-78|#|TC226465|-|homologue to gb|AF207016.1| Schizanthus pinnatus 18S ribosomal RNA gene, complete sequence, partial (29%)|-|66-83|#|	-0.210292	0.979922	0.647622	0.721976	-0.273905	0.779334	-0.208746	0.894906	-0.179721	1	-1.08829	0.0780654	0.0300731	1	-1.45972	0.00100361	-1.3943	0.000563765	7.59	3.39	9.59	7.12	3.87	5.63	10.16	1.61	5.03	5.39	8.32	5.49	8.64	2.37	0	6.42	8.3	12.35	25.49	7.73	13.91	9.3	2.59	4.19	5.13	7.08	5.05	6.32
StET017240	GGATAACACTATAGGAT	TC203029	TC203029|-|emb|X51576.1|LERRN17 Tomato 17S rRNA gene, partial (40%)|-|373-390|#|TC205622|-|gb|AF207016.1| Schizanthus pinnatus 18S ribosomal RNA gene, complete sequence, partial (24%)|-|61-78|#|TC226465|-|homologue to gb|AF207016.1| Schizanthus pinnatus 18S ribosomal RNA gene, complete sequence, partial (29%)|-|66-83|#|	0.277838	0.893224	0.559183	0.370554	0.116823	1	-0.29827	0.743662	0.0134028	1	-0.275804	0.957783	0.237478	0.87182	-1.51954	0.0146199	-1.25898	0.0230186	10.32	3.39	7.99	10.68	7.73	11.27	12.01	4.84	12.57	6.29	9.99	8.54	20.61	11.85	8.43	11.93	11.99	14.53	16.39	0	10.43	11.63	10.35	6.71	3.42	6.49	6.73	8.43
StET021380	TACAGAGGGGACACTCC	TC205834	TC205834|-|similar to UniRef100_A7PCG8 Cluster: Chromosome chr2 scaffold_11, whole genome shotgun sequence; n=1; Vitis vinifera|Rep: Chromosome chr2 scaffold_11, whole genome shotgun sequence - Vitis vinifera (Grape), partial (43%)|-|368-385|#|TC205924|-|similar to UniRef100_A7PCG8 Cluster: Chromosome chr2 scaffold_11, whole genome shotgun sequence; n=1; Vitis vinifera|Rep: Chromosome chr2 scaffo…	-0.175394	0.96868	0.277202	0.907437	-1.88001	0.197148	-1.24538	0.231216	1.11702	0.68081	-1.01908	0.752325	-0.575524	0.305991	2.45376	0.00114621	1.77476	5.34473481007372e-09	44.21	49.12	51.14	46.28	58.94	58.21	58.18	37.89	98.04	76.36	43.29	6.71	29.92	111.36	101.18	3.67	118.97	24.7	42.79	115.98	63.75	137.19	43.11	48.62	83.8	3.54	25.23	12.64
StET001530	AACTGCAACTTTATTTT	TC206380	TC206380|-|similar to UniRef100_A7P4S4 Cluster: Chromosome chr4 scaffold_6, whole genome shotgun sequence; n=1; Vitis vinifera|Rep: Chromosome chr4 scaffold_6, whole genome shotgun sequence - Vitis vinifera (Grape), partial (79%)|-|1739-1756|#|	2.80937	0.287995	0.0341756	1	2.31027	0.155548	-0.130452	1	-2.17689	0.528146	-2.84202	0.451563	-0.895028	0.81375	-2.78353	0.0313188	-3.59678	0.00833422	3	0	0	0	0	0	0	8.06	0	23.36	0	10.97	0	0	0	0	0	0	0	0	0	0	0	4.19	0	0	8.41	0
StET004851	AGACCTTTGCTACAAGA	TC206944	TC206944|-|homologue to UniRef100_Q40431 Cluster: PSI-H precursor; n=1; Nicotiana sylvestris|Rep: PSI-H precursor - Nicotiana sylvestris (Wood tobacco), partial (97%)|-|712-729|#|	-0.406111	0.827221	-1.0276	0.288387	-1.36454	0.00787094	-1.62986	0.00653964	-0.517543	0.743473	-3.21598	2.15989e-05	-0.413805	0.664025	-1.04922	0.0099108	-1.46283	0.00574297	6.96	16.94	8.79	2.85	9.66	7.51	7.39	0	7.54	4.49	9.16	11.58	3.32	0	0	2.75	4.61	3.63	8.19	10.82	13.91	8.14	8.62	9.22	17.1	5.9	1.68	0
StET000467	AAAATTGCTTAGATAAG	TC207315	TC207315|-|NA|-|311-328|#|	-0.0998516	1	-0.347632	0.961886	0.21809	1	1.99852	0.205835	-0.249481	1	-3.47911	0.352455	0.95731	0.543478	-4.08157	0.00120191	-3.10905	0.0275392	3.1	0	0	0	4.83	0	3.69	0	0	0	0	6.1	1.33	5.92	0	0	0	0	0	0	0	0	0	0	0	0	0	0
StET010671	CATGTAAAAATCTAGAA	TC207520	TC207520|-|similar to UniRef100_A7PVK1 Cluster: Chromosome chr9 scaffold_33, whole genome shotgun sequence; n=1; Vitis vinifera|Rep: Chromosome chr9 scaffold_33, whole genome shotgun sequence - Vitis vinifera (Grape), partial (73%)|-|1143-1160|#|TC223777|-|similar to UniRef100_A7PVK1 Cluster: Chromosome chr9 scaffold_33, whole genome shotgun sequence; n=1; Vitis vinifera|Rep: Chromosome chr9 scaf…	-1.28937	0.491342	-0.451134	0.858628	1.814	0.111888	0.868265	0.527339	-1.80497	0.336804	0.0749209	1	0.0491217	1	-2.40696	0.0119475	-2.35369	0.00439613	3.63	3.39	0	3.56	0	0	3.69	0	0	0	1.66	1.22	0	0	4.22	0	0	2.91	0	7.73	0	0	2.59	0	0	7.67	3.36	4.21
StET004557	AGAAACTACAAGTTGTA	TC207848	TC207848|-|similar to UniRef100_Q2MGR6 Cluster: Intracellular chloride channel; n=1; Medicago truncatula|Rep: Intracellular chloride channel - Medicago truncatula (Barrel medic), partial (97%)|-|1452-1468|#|	1.96936	0.511053	0.4718	0.878236	1.16619	0.441471	2.08846	0.134238	-0.461722	1	-1.36233	0.528603	0.957132	0.543478	-3.98996	2.31477e-06	-3.04497	0.000636193	4.22	0	4	0	0	0	3.69	0	0	0	30.8	0	15.96	13.03	0	0	0	1.45	0	0	0	0	0	0	0	7.08	0	0
StET011403	CCTTACTTACTGAATGT	TC208574	TC208574|-|similar to UniRef100_A7PIP7 Cluster: Chromosome chr13 scaffold_17, whole genome shotgun sequence; n=1; Vitis vinifera|Rep: Chromosome chr13 scaffold_17, whole genome shotgun sequence - Vitis vinifera (Grape), partial (61%)|-|688-705|#|	1.82126	0.506598	2.95525	0.110414	1.3561	0.267871	2.49179	0.169854	-1.94879	0.671423	-1.47061	1	-0.158269	1	-3.54126	0.0271036	-3.65821	0.0395009	3.52	0	0	0	0	0	0	0	16.34	0	0	0	4.65	9.48	0	20.19	0	1.45	13.66	0	0	0	0	0	0	5.31	0	0
StET024946	TCTTTATGTATCTTTGA	TC208616	TC208616|-|similar to UniRef100_Q10MK9 Cluster: AMP-binding enzyme family protein, expressed; n=1; Oryza sativa Japonica Group|Rep: AMP-binding enzyme family protein, expressed - Oryza sativa subsp. japonica (Rice), partial (21%)|-|669-686|#|	2.50633	0.40612	3.55574	0.0571938	0.917671	0.504304	0.792883	0.696037	-1.23572	0.648824	-1.52987	0.420913	-0.158269	1	-3.87831	1.42839e-05	-4.0234	2.26112584215130e-05	4.33	0	0	0	0	0	0	0	18.85	0	0	0	14.63	9.48	33.73	0	28.59	7.26	0	0	0	0	0	0	0	0	6.73	0
StET006697	ATATCAAGAAATGTGCA	TC208916	TC208916|-|homologue to UniRef100_Q6RUF6 Cluster: Fructose-bisphosphate aldolase; n=1; Glycine max|Rep: Fructose-bisphosphate aldolase - Glycine max (Soybean), complete|-|647-664|#|	-1.8076	0.406439	-1.22517	0.563394	-0.197162	1	0.9564	0.647374	-1.41246	0.898498	-4.40385	1	1.10394	0.571654	-5.07315	0.00334272	-4.05093	0.0427731	3.29	0	7.99	0	0	0	0	0	0	0	0	0	0	0	0	0	0	0	0	0	0	0	0	0	0	0	0	0
StET020853	TAATCTATTCAAAAATA	TC209963	TC209963|-|UniRef100_P06183 Cluster: Photosystem II 10 kDa polypeptide, chloroplast precursor; n=1; Solanum tuberosum|Rep: Photosystem II 10 kDa polypeptide, chloroplast precursor - Solanum tuberosum (Potato), complete|-|549-566|#|TC210629|-|homologue to UniRef100_P06183 Cluster: Photosystem II 10 kDa polypeptide, chloroplast precursor; n=1; Solanum tuberosum|Rep: Photosystem II 10 kDa polypeptid…	0.384213	0.531517	-0.0933351	1	0.0994289	1	-0.431391	0.505555	0.0695232	1	-1.82089	0.00280512	0.659511	0.245089	-1.88501	1.81859e-06	-1.22112	0.00233676	21.81	23.71	21.58	16.38	21.26	31.92	26.78	21.77	31.42	27.85	33.3	34.75	23.94	0	6.32	22.94	23.06	30.51	37.33	10.82	12.75	12.79	24.14	10.06	15.39	20.06	14.3	4.21
StET020914	TAATCTTTTGAAAAATA	TC209963	TC209963|-|UniRef100_P06183 Cluster: Photosystem II 10 kDa polypeptide, chloroplast precursor; n=1; Solanum tuberosum|Rep: Photosystem II 10 kDa polypeptide, chloroplast precursor - Solanum tuberosum (Potato), complete|-|549-566|#|TC210629|-|homologue to UniRef100_P06183 Cluster: Photosystem II 10 kDa polypeptide, chloroplast precursor; n=1; Solanum tuberosum|Rep: Photosystem II 10 kDa polypeptid…	0.34772	0.764195	-0.192182	0.95741	0.298128	0.834274	-0.400154	0.595964	-0.437235	0.887571	-0.669848	0.48734	0.633032	0.434351	-1.79769	6.34129e-05	-1.16187	0.0121538	7.06	8.47	5.59	7.83	8.7	7.51	8.31	10.48	10.06	8.98	8.32	10.37	7.98	2.37	0	13.77	1.84	5.81	10.92	4.64	8.11	4.65	3.45	3.35	6.84	7.08	1.68	4.21
StET020912	TAATCTTTTCTAAAATA	TC209963	TC209963|-|UniRef100_P06183 Cluster: Photosystem II 10 kDa polypeptide, chloroplast precursor; n=1; Solanum tuberosum|Rep: Photosystem II 10 kDa polypeptide, chloroplast precursor - Solanum tuberosum (Potato), complete|-|549-566|#|TC210629|-|homologue to UniRef100_P06183 Cluster: Photosystem II 10 kDa polypeptide, chloroplast precursor; n=1; Solanum tuberosum|Rep: Photosystem II 10 kDa polypeptid…	0.144504	0.914414	0.0947489	1	-0.067124	1	-0.801468	0.16149	-0.462507	0.727145	-0.839899	0.037665	-0.0263186	1	-1.06486	0.0362634	-1.09441	0.0143274	38.03	25.41	35.96	42.01	25.12	50.69	44.33	34.66	57.82	42.22	36.63	47.56	26.6	8.29	44.26	38.54	50.73	40.68	50.07	23.2	61.44	44.18	25	30.18	47.89	59.58	20.19	29.49
StET023274	TATTAATTATAATTAAG	TC210616	TC210616|-|similar to UniRef100_A7QF68 Cluster: Chromosome undetermined scaffold_87, whole genome shotgun sequence; n=1; Vitis vinifera|Rep: Chromosome undetermined scaffold_87, whole genome shotgun sequence - Vitis vinifera (Grape), partial (84%)|-|520-537|#|TC213085|-|similar to UniRef100_A7QF68 Cluster: Chromosome undetermined scaffold_87, whole genome shotgun sequence; n=1; Vitis vinifera|Rep…	0.302756	0.951223	0.856136	0.607292	-1.53693	0.0341566	-1.52085	0.0152902	-1.27065	0.183606	-4.04962	0.00134839	-1.07884	0.183792	-1.54039	0.0124614	-2.6266	1.46395755534305e-06	6.39	3.39	6.39	2.14	6.76	3.76	3.69	0	5.03	3.59	6.66	10.97	3.32	0	6.32	4.59	3.69	3.63	23.67	4.64	13.91	15.11	5.17	7.55	10.26	5.9	1.68	4.21
StET022444	TATAAATAATAATTAAG	TC210616	TC210616|-|similar to UniRef100_A7QF68 Cluster: Chromosome undetermined scaffold_87, whole genome shotgun sequence; n=1; Vitis vinifera|Rep: Chromosome undetermined scaffold_87, whole genome shotgun sequence - Vitis vinifera (Grape), partial (84%)|-|520-537|#|TC213085|-|similar to UniRef100_A7QF68 Cluster: Chromosome undetermined scaffold_87, whole genome shotgun sequence; n=1; Vitis vinifera|Rep…	0.042867	1	0.885811	0.612179	-0.301821	0.835639	-1.02147	0.316727	-0.865804	0.547382	-1.88309	0.0276153	0.292937	0.998554	-2.37931	3.33881e-06	-2.12218	1.90363974905521e-05	3.49	5.08	2.4	0	3.87	0	7.39	0	3.77	3.59	3.33	7.93	1.33	0	0	6.42	7.38	4.36	14.57	0	4.64	0	1.72	3.35	5.13	4.72	0	0
StET022462	TATAAATTATAATGAAG	TC210616	TC210616|-|similar to UniRef100_A7QF68 Cluster: Chromosome undetermined scaffold_87, whole genome shotgun sequence; n=1; Vitis vinifera|Rep: Chromosome undetermined scaffold_87, whole genome shotgun sequence - Vitis vinifera (Grape), partial (84%)|-|520-537|#|TC213085|-|similar to UniRef100_A7QF68 Cluster: Chromosome undetermined scaffold_87, whole genome shotgun sequence; n=1; Vitis vinifera|Rep…	0.244042	1	0.286995	1	-0.819507	0.41549	-1.43646	0.0989574	-0.815309	0.645271	-2.78789	0.0708865	-0.479994	0.784902	-1.5624	0.018155	-2.03015	0.00635142	2.61	3.39	2.4	0	3.87	0	4.62	0	0	1.8	4.99	5.49	3.32	0	0	1.84	0	0	11.83	0	5.8	3.49	4.31	2.52	5.13	4.72	0	0
StET022498	TATAACTTATAATTAAG	TC210616	TC210616|-|similar to UniRef100_A7QF68 Cluster: Chromosome undetermined scaffold_87, whole genome shotgun sequence; n=1; Vitis vinifera|Rep: Chromosome undetermined scaffold_87, whole genome shotgun sequence - Vitis vinifera (Grape), partial (84%)|-|520-537|#|TC213085|-|similar to UniRef100_A7QF68 Cluster: Chromosome undetermined scaffold_87, whole genome shotgun sequence; n=1; Vitis vinifera|Rep…	-0.410533	0.926869	0.515231	0.8734	-1.55503	0.0179726	-2.01589	0.000224247	-1.46419	0.00340132	-2.0922	0.00530156	-0.906173	0.34764	-0.971486	0.0262892	-1.85365	5.87179302729415e-05	4.76	3.39	9.59	0	5.8	0	5.54	1.61	0	2.7	6.66	6.1	1.33	0	0	0	4.61	3.63	21.85	6.19	13.91	12.79	5.17	5.87	10.26	2.36	0	4.21
StET014952	GAGTTTAGTGAAGAGAA	TC210741	TC210741|-|NA|-|651-668|#|	-0.649992	0.870245	0.0181754	1	0.418479	0.747931	-1.59478	0.197878	4.05357	0.389079	1.81282	0.232784	-0.698875	0.692661	4.36163	0.00462564	3.6627	0.0424363	25.31	45.74	6.39	7.12	46.38	31.92	12.93	50.79	0	26.95	0	3.66	9.97	26.06	59.02	31.2	9.22	14.53	13.66	75.77	83.46	9.3	36.21	14.25	27.36	71.97	21.03	86.37
StET005034	AGATCATTGAAATCTTC	TC210993	TC210993|-|similar to UniRef100_A7PPJ1 Cluster: Chromosome chr8 scaffold_23, whole genome shotgun sequence; n=1; Vitis vinifera|Rep: Chromosome chr8 scaffold_23, whole genome shotgun sequence - Vitis vinifera (Grape), partial (57%)|-|296-312|#|TC220852|-|similar to UniRef100_A7PPJ1 Cluster: Chromosome chr8 scaffold_23, whole genome shotgun sequence; n=1; Vitis vinifera|Rep: Chromosome chr8 scaffo…	2.56412	0.331232	2.13263	0.201214	2.90892	0.142399	0.886177	0.637978	0.512023	1	-1.69139	0.726561	-0.158269	1	-3.3916	0.0101014	-3.52215	0.0135473	4.32	0	0	0	0	0	0	0	0	20.66	0	1.83	11.3	5.92	0	0	0	3.63	11.83	0	0	0	0	0	0	17.11	0	33.71
StET029614	TTTATTCTCTAGATATA	TC211389	TC211389|-|homologue to UniRef100_Q41228 Cluster: Photosystem I reaction center subunit IV A, chloroplast precursor (PSI-E A) [Contains: Photosystem I reaction center subunit IV A isoform 2]; n=3; Nicotiana sylvestris|Rep: Photosystem I reaction center subunit IV A, chloroplast precursor (PSI-E A) [Contains: Photosystem I reaction center subunit IV A isoform 2] - Nicotiana sylvestris (Wood tobacc…	0.221135	0.965198	0.568943	0.771809	-0.765453	0.351137	-1.10889	0.140594	-0.710654	0.597332	-1.21176	0.432009	-0.448138	0.56955	-1.80988	0.000465924	-2.27865	0.0001924	5.67	0	3.2	4.27	8.7	0	5.54	2.42	3.77	1.8	3.33	12.19	4.65	0	0	2.75	8.3	8.72	11.83	3.09	6.96	6.98	6.9	5.03	8.55	4.72	1.68	0
StET023690	TATTTTAATTGAGAGAT	TC211539	TC211539|-|similar to UniRef100_A7P7A5 Cluster: Chromosome chr9 scaffold_7, whole genome shotgun sequence; n=1; Vitis vinifera|Rep: Chromosome chr9 scaffold_7, whole genome shotgun sequence - Vitis vinifera (Grape), partial (61%)|-|556-573|#|TC224779|-|similar to UniRef100_A7P7A5 Cluster: Chromosome chr9 scaffold_7, whole genome shotgun sequence; n=1; Vitis vinifera|Rep: Chromosome chr9 scaffold_…	-0.431136	0.814457	-0.46342	0.85139	-0.739828	0.305465	-0.787777	0.227758	-0.409105	0.616064	-1.40219	0.4864	0.0269918	1	-1.37309	0.000462704	-1.31395	0.0242677	9.37	5.08	7.19	7.12	15.46	13.14	16.62	2.42	5.03	8.09	4.16	15.85	9.31	0	8.43	1.84	0	16.71	13.66	10.82	9.27	6.98	10.35	9.22	18.81	10.03	3.36	0
StET023691	TATTTTAATTGAGCGAT	TC211539	TC211539|-|similar to UniRef100_A7P7A5 Cluster: Chromosome chr9 scaffold_7, whole genome shotgun sequence; n=1; Vitis vinifera|Rep: Chromosome chr9 scaffold_7, whole genome shotgun sequence - Vitis vinifera (Grape), partial (61%)|-|556-573|#|TC224779|-|similar to UniRef100_A7P7A5 Cluster: Chromosome chr9 scaffold_7, whole genome shotgun sequence; n=1; Vitis vinifera|Rep: Chromosome chr9 scaffold_…	-0.362921	0.86058	-0.425902	0.791915	-0.736186	0.221229	-1.10391	0.09441	-0.533536	0.767732	-1.56455	0.0376472	0.298792	0.823927	-1.32567	0.000208587	-1.04464	0.00824933	7.65	5.08	8.79	8.54	14.49	7.51	14.78	0	3.77	8.98	8.32	12.8	9.31	0	0	3.67	11.07	7.99	14.57	3.09	11.59	9.3	12.07	6.71	5.13	7.08	4.21	6.32
StET007135	ATCCCATTCATTACACT	TC211705	TC211705|-|homologue to UniRef100_P55857 Cluster: Ubiquitin-like protein SMT3; n=3; Oryza sativa|Rep: Ubiquitin-like protein SMT3 - Oryza sativa subsp. japonica (Rice), partial (88%)|-|427-443|#|	1.28262	0.700028	2.2591	0.258404	-0.197162	1	2.15455	0.173111	-4.26378	0.284051	-1.43511	1	0.715967	0.725669	-3.94539	0.00980038	-3.29553	0.045867	3.36	0	4.79	0	0	0	0	0	0	0	0	10.37	9.31	16.59	0	0	31.36	2.18	0	0	0	0	0	0	0	0	0	0
StET004370	ACTGTTCAAATCTCAAG	TC211797	TC211797|-|homologue to UniRef100_A7P6L5 Cluster: Chromosome chr9 scaffold_7, whole genome shotgun sequence; n=1; Vitis vinifera|Rep: Chromosome chr9 scaffold_7, whole genome shotgun sequence - Vitis vinifera (Grape), partial (88%)|-|1069-1086|#|	1.77415	0.495345	0.619161	0.797767	2.25573	0.12242	1.90598	0.165916	-4.58027	0.00374281	-3.67829	0.104584	-0.158269	1	-4.23694	5.72281e-06	-4.37605	1.06014724364433e-05	2.78	0	0	0	0	0	0	0	0	5.39	0	0	11.3	3.55	0	0	0	1.45	0	0	0	0	0	0	0	7.08	5.89	0
StET001322	AACATTTACTTTTCATA	TC212710	TC212710|-|UniRef100_Q93XJ9 Cluster: Ferredoxin I precursor; n=1; Solanum tuberosum|Rep: Ferredoxin I precursor - Solanum tuberosum (Potato), partial (97%)|-|539-556|#|TC214362|-|UniRef100_Q93XJ9 Cluster: Ferredoxin I precursor; n=1; Solanum tuberosum|Rep: Ferredoxin I precursor - Solanum tuberosum (Potato), complete|-|501-518|#|	0.0313124	1	-0.239626	0.931318	-0.835203	0.438366	-1.69008	0.0615396	-1.00086	0.616064	-1.45644	0.527995	-0.162626	1	-2.30187	0.0166562	-2.45772	0.0186518	7.31	5.08	8.79	2.14	1.93	9.39	10.16	0	3.77	8.09	4.16	11.58	7.31	0	0	2.75	11.07	5.81	6.37	3.09	17.39	8.14	2.59	7.55	3.42	2.95	3.36	8.43
StET005491	AGCTTTTACTTTTCATA	TC212710	TC212710|-|UniRef100_Q93XJ9 Cluster: Ferredoxin I precursor; n=1; Solanum tuberosum|Rep: Ferredoxin I precursor - Solanum tuberosum (Potato), partial (97%)|-|539-556|#|TC214362|-|UniRef100_Q93XJ9 Cluster: Ferredoxin I precursor; n=1; Solanum tuberosum|Rep: Ferredoxin I precursor - Solanum tuberosum (Potato), complete|-|501-518|#|	0.407816	0.814457	-0.202372	1	-0.875958	0.245966	-1.68998	0.00618962	-0.808864	0.651849	-2.46106	2.83709e-05	-0.901464	0.307123	-1.25739	0.00358742	-2.17989	0.00049697	8.85	0	12.79	4.27	5.8	3.76	11.08	3.22	16.34	8.98	8.32	11.58	6.65	0	0	1.84	6.46	10.17	10.01	9.28	24.34	16.28	6.9	12.58	10.26	7.67	5.89	0
StET004820	AGAATTTACTTTTCATA	TC212710	TC212710|-|UniRef100_Q93XJ9 Cluster: Ferredoxin I precursor; n=1; Solanum tuberosum|Rep: Ferredoxin I precursor - Solanum tuberosum (Potato), partial (97%)|-|539-556|#|TC214362|-|UniRef100_Q93XJ9 Cluster: Ferredoxin I precursor; n=1; Solanum tuberosum|Rep: Ferredoxin I precursor - Solanum tuberosum (Potato), complete|-|501-518|#|	0.0100923	1	-0.259891	0.963027	-1.11882	0.0932306	-1.22539	0.201826	-0.804864	0.257147	-2.2811	5.96149e-09	-0.409384	0.674023	-1.56266	0.000108448	-1.95852	3.07577137372976e-09	15.76	5.08	22.37	11.39	16.43	15.02	16.62	3.22	17.6	14.37	13.32	21.95	15.29	2.37	0	1.84	13.83	21.07	23.67	12.37	39.41	22.09	13.79	15.09	17.1	14.16	7.57	4.21
StET005368	AGCCTTTACTTTTCATA	TC212710	TC212710|-|UniRef100_Q93XJ9 Cluster: Ferredoxin I precursor; n=1; Solanum tuberosum|Rep: Ferredoxin I precursor - Solanum tuberosum (Potato), partial (97%)|-|539-556|#|TC214362|-|UniRef100_Q93XJ9 Cluster: Ferredoxin I precursor; n=1; Solanum tuberosum|Rep: Ferredoxin I precursor - Solanum tuberosum (Potato), complete|-|501-518|#|	-0.261394	0.932631	0.159626	1	-0.376516	0.757517	-1.01156	0.333317	-0.681538	0.595752	-2.85014	1.72559e-05	-0.549772	0.687959	-1.43111	0.00246179	-1.95646	0.00032389	8.38	5.08	14.38	4.27	5.8	0	10.16	4.03	6.28	3.59	7.49	9.15	4.65	2.37	0	3.67	10.15	13.08	11.83	0	16.23	9.3	10.35	11.74	13.68	5.9	6.73	4.21
StET005329	AGCATTTATTTTTCATA	TC212710	TC212710|-|UniRef100_Q93XJ9 Cluster: Ferredoxin I precursor; n=1; Solanum tuberosum|Rep: Ferredoxin I precursor - Solanum tuberosum (Potato), partial (97%)|-|539-556|#|TC214362|-|UniRef100_Q93XJ9 Cluster: Ferredoxin I precursor; n=1; Solanum tuberosum|Rep: Ferredoxin I precursor - Solanum tuberosum (Potato), complete|-|501-518|#|	0.237924	0.958849	-0.769235	0.560459	-0.457029	0.687963	-1.30107	0.231048	-1.21736	0.10862	-2.40007	0.00375995	0.299134	0.912603	-2.19747	0.000409956	-1.92314	0.0193081	5.99	3.39	11.19	3.56	2.9	5.63	12.93	3.22	7.54	5.39	4.99	17.07	7.31	0	0	5.51	1.84	5.81	5.46	0	12.75	5.81	6.9	4.19	0	4.13	3.36	6.32
StET005316	AGCATTTACTTTGCATA	TC212710	TC212710|-|UniRef100_Q93XJ9 Cluster: Ferredoxin I precursor; n=1; Solanum tuberosum|Rep: Ferredoxin I precursor - Solanum tuberosum (Potato), partial (97%)|-|539-556|#|TC214362|-|UniRef100_Q93XJ9 Cluster: Ferredoxin I precursor; n=1; Solanum tuberosum|Rep: Ferredoxin I precursor - Solanum tuberosum (Potato), complete|-|501-518|#|	-0.203371	1	0.0808519	1	-1.17633	0.235598	-0.790308	0.507365	-1.04106	0.240209	-2.28627	0.0043935	0.0354603	1	-1.94057	0.0043314	-1.90128	0.0193023	6.87	0	12.79	7.83	3.87	3.76	12.01	2.42	6.28	5.39	6.66	9.15	7.31	0	0	5.51	11.99	7.26	14.57	0	12.75	5.81	3.45	10.9	8.55	3.54	0	0
StET005299	AGCATTGACTTTTCATA	TC212710	TC212710|-|UniRef100_Q93XJ9 Cluster: Ferredoxin I precursor; n=1; Solanum tuberosum|Rep: Ferredoxin I precursor - Solanum tuberosum (Potato), partial (97%)|-|539-556|#|TC214362|-|UniRef100_Q93XJ9 Cluster: Ferredoxin I precursor; n=1; Solanum tuberosum|Rep: Ferredoxin I precursor - Solanum tuberosum (Potato), complete|-|501-518|#|	0.199817	0.97364	-0.408338	0.873807	-1.30293	0.0517166	-1.84513	2.56443e-05	-0.651499	0.502311	-1.47001	0.0331363	-0.610505	0.473892	-1.24409	0.000208587	-1.89965	0.0291334	7.92	0	13.58	3.56	4.83	13.14	7.39	5.64	11.31	9.88	4.99	10.37	7.31	0	0	1.84	6.46	6.54	11.83	12.37	15.07	12.79	6.9	10.9	10.26	4.13	0	0
StET005305	AGCATTTACATTTCATA	TC212710	TC212710|-|UniRef100_Q93XJ9 Cluster: Ferredoxin I precursor; n=1; Solanum tuberosum|Rep: Ferredoxin I precursor - Solanum tuberosum (Potato), partial (97%)|-|539-556|#|TC214362|-|UniRef100_Q93XJ9 Cluster: Ferredoxin I precursor; n=1; Solanum tuberosum|Rep: Ferredoxin I precursor - Solanum tuberosum (Potato), complete|-|501-518|#|	-0.00303108	1	-0.272748	0.940235	-0.694439	0.34614	-0.929647	0.234988	-0.641755	0.696391	-0.761057	0.291184	-0.0382858	1	-1.80993	7.4367e-05	-1.84924	0.000265122	5.8	3.39	7.19	3.56	6.76	0	9.24	1.61	7.54	3.59	8.32	5.49	6.65	0	0	0	5.53	10.17	4.55	3.09	10.43	4.65	2.59	7.55	6.84	4.13	3.36	6.32
StET005317	AGCATTTACTTTTAATA	TC212710	TC212710|-|UniRef100_Q93XJ9 Cluster: Ferredoxin I precursor; n=1; Solanum tuberosum|Rep: Ferredoxin I precursor - Solanum tuberosum (Potato), partial (97%)|-|539-556|#|TC214362|-|UniRef100_Q93XJ9 Cluster: Ferredoxin I precursor; n=1; Solanum tuberosum|Rep: Ferredoxin I precursor - Solanum tuberosum (Potato), complete|-|501-518|#|	-0.0542428	1	-1.1121	0.329579	-1.25588	0.134079	-1.6431	0.112252	-0.534829	0.840436	-2.14144	0.00102562	-0.434624	0.620852	-1.34782	7.60707e-05	-1.78032	0.00272495	12.84	5.08	24.77	7.83	12.56	11.27	16.62	4.84	18.85	15.27	9.16	18.29	9.31	0	0	2.75	8.3	8.72	10.01	20.1	25.5	13.95	9.48	20.12	22.23	7.08	1.68	4.21
StET005308	AGCATTTACTATTCATA	TC212710	TC212710|-|UniRef100_Q93XJ9 Cluster: Ferredoxin I precursor; n=1; Solanum tuberosum|Rep: Ferredoxin I precursor - Solanum tuberosum (Potato), partial (97%)|-|539-556|#|TC214362|-|UniRef100_Q93XJ9 Cluster: Ferredoxin I precursor; n=1; Solanum tuberosum|Rep: Ferredoxin I precursor - Solanum tuberosum (Potato), complete|-|501-518|#|	-0.0639013	1	-0.193949	1	-1.23496	0.131672	-1.77833	0.00866718	-0.715102	0.680506	-1.8813	0.00218631	-0.226173	0.926092	-1.55412	0.0133378	-1.77151	0.0175681	9.06	5.08	15.98	5.7	15.46	0	11.08	6.45	8.8	8.09	5.83	15.24	7.98	0	4.22	0	10.15	13.08	14.57	10.82	25.5	8.14	6.04	6.71	11.97	3.54	2.52	0
StET005240	AGCAGTTACTTTTCATA	TC212710	TC212710|-|UniRef100_Q93XJ9 Cluster: Ferredoxin I precursor; n=1; Solanum tuberosum|Rep: Ferredoxin I precursor - Solanum tuberosum (Potato), partial (97%)|-|539-556|#|TC214362|-|UniRef100_Q93XJ9 Cluster: Ferredoxin I precursor; n=1; Solanum tuberosum|Rep: Ferredoxin I precursor - Solanum tuberosum (Potato), complete|-|501-518|#|	-0.345109	0.866359	-0.539576	0.712184	-1.05858	0.288165	-1.08471	0.191655	-1.11436	0.234703	-2.19331	0.00237684	-0.300792	0.834106	-1.45435	0.00280305	-1.76606	0.0135473	10.41	3.39	19.18	6.41	8.7	11.27	16.62	4.84	6.28	9.88	7.49	14.02	7.98	2.37	6.32	2.75	12.91	10.17	9.1	9.28	12.75	10.46	10.35	20.96	18.81	3.54	0	6.32
StET005304	AGCATTTAATTTTCATA	TC212710	TC212710|-|UniRef100_Q93XJ9 Cluster: Ferredoxin I precursor; n=1; Solanum tuberosum|Rep: Ferredoxin I precursor - Solanum tuberosum (Potato), partial (97%)|-|539-556|#|TC214362|-|UniRef100_Q93XJ9 Cluster: Ferredoxin I precursor; n=1; Solanum tuberosum|Rep: Ferredoxin I precursor - Solanum tuberosum (Potato), complete|-|501-518|#|	0.0326551	1	-0.611728	0.75155	-1.49928	2.58979e-05	-1.64876	0.0445654	-0.356386	0.86258	-2.0379	4.84053e-08	-0.422766	0.659582	-1.19142	6.61136e-08	-1.63303	0.0435055	15.59	3.39	27.97	9.26	19.33	11.27	23.09	6.45	16.34	13.48	16.65	26.22	15.96	2.37	0	3.67	11.99	19.61	16.39	18.56	24.34	26.74	18.11	17.61	27.36	7.67	7.57	4.21
StET005313	AGCATTTACTTGTCATA	TC212710	TC212710|-|UniRef100_Q93XJ9 Cluster: Ferredoxin I precursor; n=1; Solanum tuberosum|Rep: Ferredoxin I precursor - Solanum tuberosum (Potato), partial (97%)|-|539-556|#|TC214362|-|UniRef100_Q93XJ9 Cluster: Ferredoxin I precursor; n=1; Solanum tuberosum|Rep: Ferredoxin I precursor - Solanum tuberosum (Potato), complete|-|501-518|#|	0.24156	0.932301	-0.32357	0.897066	-0.629695	0.441083	-1.41019	0.0153006	-0.751217	0.767732	-2.3469	0.0507631	-0.0721933	1	-1.44419	2.96626e-05	-1.57283	0.023912	8.41	3.39	15.98	6.41	4.83	7.51	12.93	1.61	8.8	11.68	13.32	14.02	10.64	0	4.22	4.59	6.46	10.9	10.92	6.19	12.75	13.95	8.62	6.71	8.55	3.54	4.21	6.32
StET005310	AGCATTTACTGTTCATA	TC212710	TC212710|-|UniRef100_Q93XJ9 Cluster: Ferredoxin I precursor; n=1; Solanum tuberosum|Rep: Ferredoxin I precursor - Solanum tuberosum (Potato), partial (97%)|-|539-556|#|TC214362|-|UniRef100_Q93XJ9 Cluster: Ferredoxin I precursor; n=1; Solanum tuberosum|Rep: Ferredoxin I precursor - Solanum tuberosum (Potato), complete|-|501-518|#|	-0.180624	0.995328	-0.402565	0.896706	-1.3228	0.0178888	-1.34581	0.00611526	-0.908867	0.738694	-1.76007	0.0133254	-0.0557718	1	-1.39382	0.000104826	-1.54641	0.015087	7.04	0	15.98	7.12	8.7	7.51	7.39	2.42	7.54	8.09	9.16	12.8	2.66	0	0	0	3.69	7.26	17.3	10.82	11.59	10.46	8.62	6.71	6.84	2.95	2.52	0
StET005319	AGCATTTACTTTTCACA	TC212710	TC212710|-|UniRef100_Q93XJ9 Cluster: Ferredoxin I precursor; n=1; Solanum tuberosum|Rep: Ferredoxin I precursor - Solanum tuberosum (Potato), partial (97%)|-|539-556|#|TC214362|-|UniRef100_Q93XJ9 Cluster: Ferredoxin I precursor; n=1; Solanum tuberosum|Rep: Ferredoxin I precursor - Solanum tuberosum (Potato), complete|-|501-518|#|	0.0305466	1	-0.190961	0.969478	-0.984198	0.0564956	-2.04614	6.08036e-08	-0.503841	0.873965	-2.16866	0.314425	-0.389905	0.478661	-0.968934	0.00251518	-1.38013	0.00160754	10.39	5.08	19.18	8.54	11.6	5.63	12.01	8.06	21.37	5.39	9.16	12.8	9.31	0	6.32	3.67	14.76	13.8	11.83	15.46	20.87	15.11	12.93	13.41	10.26	5.31	6.73	8.43
StET005332	AGCATTTGCTTTTCATA	TC212710	TC212710|-|UniRef100_Q93XJ9 Cluster: Ferredoxin I precursor; n=1; Solanum tuberosum|Rep: Ferredoxin I precursor - Solanum tuberosum (Potato), partial (97%)|-|539-556|#|TC214362|-|UniRef100_Q93XJ9 Cluster: Ferredoxin I precursor; n=1; Solanum tuberosum|Rep: Ferredoxin I precursor - Solanum tuberosum (Potato), complete|-|501-518|#|	-0.288862	0.841538	-0.450382	0.751465	-0.932881	0.15417	-1.35143	0.0318573	-0.731817	0.60813	-2.06742	0.0251652	-0.0168753	1	-1.36507	0.00738631	-1.37923	0.0247805	8.67	6.78	18.38	4.98	9.66	9.39	12.01	4.03	10.06	8.09	9.99	12.19	5.32	0	6.32	3.67	9.22	12.35	9.1	9.28	20.87	9.3	7.76	8.38	8.55	5.31	2.52	0
StET005314	AGCATTTACTTTACATA	TC212710	TC212710|-|UniRef100_Q93XJ9 Cluster: Ferredoxin I precursor; n=1; Solanum tuberosum|Rep: Ferredoxin I precursor - Solanum tuberosum (Potato), partial (97%)|-|539-556|#|TC214362|-|UniRef100_Q93XJ9 Cluster: Ferredoxin I precursor; n=1; Solanum tuberosum|Rep: Ferredoxin I precursor - Solanum tuberosum (Potato), complete|-|501-518|#|	-0.253765	0.935435	-0.595222	0.734455	-1.19511	0.117751	-1.42277	0.0761538	-0.807054	0.600401	-1.77931	0.00825753	0.0226167	1	-1.43297	0.0153705	-1.36154	0.00156634	6.53	3.39	10.39	8.54	8.7	3.76	12.01	6.45	8.8	4.49	2.5	13.41	3.99	0	0	1.84	4.61	8.72	10.01	4.64	5.8	18.6	6.04	5.87	8.55	4.72	2.52	4.21
StET005307	AGCATTTACGTTTCATA	TC212710	TC212710|-|UniRef100_Q93XJ9 Cluster: Ferredoxin I precursor; n=1; Solanum tuberosum|Rep: Ferredoxin I precursor - Solanum tuberosum (Potato), partial (97%)|-|539-556|#|TC214362|-|UniRef100_Q93XJ9 Cluster: Ferredoxin I precursor; n=1; Solanum tuberosum|Rep: Ferredoxin I precursor - Solanum tuberosum (Potato), complete|-|501-518|#|	-0.0205452	1	-0.14271	1	-0.643601	0.370631	-1.52678	0.0252806	-0.446569	0.87265	-1.78138	0.0213066	-0.0248482	1	-1.3105	0.00249804	-1.33692	0.0251908	9.95	6.78	19.18	7.83	7.73	7.51	14.78	6.45	7.54	11.68	7.49	19.51	8.64	2.37	4.22	3.67	11.07	13.8	18.21	10.82	18.55	12.79	6.04	8.38	13.68	7.08	6.73	0
StET005294	AGCATTCACTTTTCATA	TC212710	TC212710|-|UniRef100_Q93XJ9 Cluster: Ferredoxin I precursor; n=1; Solanum tuberosum|Rep: Ferredoxin I precursor - Solanum tuberosum (Potato), partial (97%)|-|539-556|#|TC214362|-|UniRef100_Q93XJ9 Cluster: Ferredoxin I precursor; n=1; Solanum tuberosum|Rep: Ferredoxin I precursor - Solanum tuberosum (Potato), complete|-|501-518|#|	-0.169194	0.974659	-0.763647	0.52338	-0.871997	0.0792898	-1.65032	0.00518193	-0.866796	0.386963	-1.37015	0.00907015	-0.203266	0.861642	-1.12967	0.000110221	-1.29218	0.0268663	11.2	11.86	24.77	7.83	8.7	7.51	16.62	4.03	11.31	9.88	16.65	13.41	12.63	0	4.22	4.59	9.22	10.17	12.75	12.37	24.34	18.6	9.48	11.74	17.1	8.26	9.25	8.43
StET005217	AGCACTTACTTTTCATA	TC212710	TC212710|-|UniRef100_Q93XJ9 Cluster: Ferredoxin I precursor; n=1; Solanum tuberosum|Rep: Ferredoxin I precursor - Solanum tuberosum (Potato), partial (97%)|-|539-556|#|TC214362|-|UniRef100_Q93XJ9 Cluster: Ferredoxin I precursor; n=1; Solanum tuberosum|Rep: Ferredoxin I precursor - Solanum tuberosum (Potato), complete|-|501-518|#|	-0.0377047	1	-0.261966	0.946876	-1.09298	0.0393611	-2.20584	5.27774e-07	-0.926465	0.435771	-1.98163	5.89536e-05	-0.61132	0.344978	-0.676845	0.0285927	-1.29031	0.0159629	12.93	11.86	27.17	8.54	8.7	11.27	14.78	6.45	7.54	15.27	21.64	23.17	3.99	2.37	6.32	2.75	8.3	25.42	16.39	15.46	32.46	26.74	18.11	20.12	15.39	8.85	8.41	10.53
StET000979	AAATGTTGGTCTAACAA	TC212819	TC212819|-|similar to UniRef100_A7P1F9 Cluster: Chromosome chr19 scaffold_4, whole genome shotgun sequence; n=1; Vitis vinifera|Rep: Chromosome chr19 scaffold_4, whole genome shotgun sequence - Vitis vinifera (Grape), partial (44%)|-|540-557|#|	0.504838	0.905541	1.67388	0.233167	2.56337	0.145872	3.06487	0.0131752	-2.72297	0.173587	-2.57905	0.0234661	1.28445	0.496864	-3.69359	0.000552649	-2.39432	0.0181332	15.47	0	7.19	10.68	7.73	0	17.55	20.15	0	0	17.48	3.66	23.27	34.36	18.97	26.61	0	31.24	37.33	0	0	0	0	10.9	3.42	6.49	10.94	0
StET018583	GTCACTACCAAACTCTT	TC212961	TC212961|-|similar to UniRef100_Q96558 Cluster: UDP-glucose 6-dehydrogenase; n=1; Glycine max|Rep: UDP-glucose 6-dehydrogenase - Glycine max (Soybean), partial (31%)|-|642-659|#|	2.1583	0.35924	1.24811	0.506844	2.87873	0.193771	1.83554	0.203574	-1.82994	0.7515	-2.1173	0.867045	-0.158269	1	-3.53575	0.01991	-3.65526	0.0292778	3.25	0	0	0	0	0	0	8.87	0	0	12.49	0	3.99	7.11	0	0	0	2.91	0	0	0	0	0	0	0	0	45.42	0
StET000895	AAATCGAGTGTTCTAGA	TC213073	TC213073|-|similar to UniRef100_A7P4G1 Cluster: Chromosome chr4 scaffold_6, whole genome shotgun sequence; n=1; Vitis vinifera|Rep: Chromosome chr4 scaffold_6, whole genome shotgun sequence - Vitis vinifera (Grape), partial (70%)|-|203-220|#|	1.5737	0.667865	1.58341	0.493291	1.35431	0.545768	0.452404	0.956157	-3.83031	0.203436	-2.75657	0.498722	0.579995	0.81375	-3.86698	0.00363368	-3.22032	0.043228	2.68	0	0	0	0	0	4.62	21.77	0	0	0	7.32	0	0	0	25.7	0	2.18	0	0	0	0	0	0	0	9.44	0	0
StET015744	GATTGATAATTTGAAAT	TC213236	TC213236|-|UniRef100_Q2VCK2 Cluster: Phosphoglycerate kinase; n=1; Solanum tuberosum|Rep: Phosphoglycerate kinase - Solanum tuberosum (Potato), complete|-|1433-1450|#|	0.324755	0.94839	0.770293	0.603283	-0.897444	0.468612	0.538965	0.510533	-0.607925	0.600401	-1.09069	0.644096	-0.27363	1	-1.79487	0.00963853	-2.0685	0.00527089	2.61	3.39	1.6	2.14	1.93	0	1.85	0	0	0	0	5.49	3.99	0	4.22	2.75	0	5.08	5.46	0	0	0	3.45	3.35	3.42	0	2.52	0
StET007408	ATGAATATTGCAAAAGA	TC213763	TC213763|-|homologue to UniRef100_O24136 Cluster: CP12 precursor; n=1; Nicotiana tabacum|Rep: CP12 precursor - Nicotiana tabacum (Common tobacco), partial (68%)|-|523-540|#|EG011253|-|similar to UniRef100_O24292 Cluster: CP12 precursor; n=1; Pisum sativum|Rep: CP12 precursor - Pisum sativum (Garden pea), partial (21%)|-|192-209|#|	0.184811	0.833434	0.0901351	0.983171	0.444267	0.712736	-0.166917	0.946013	0.0763642	1	-0.231235	0.978698	0.169654	0.986577	-1.34516	0.000686999	-1.17551	0.00353881	10.15	5.08	7.99	11.39	10.63	7.51	9.24	5.64	11.31	7.19	11.65	13.41	9.97	3.55	12.65	3.67	10.15	13.8	10.92	9.28	3.48	5.81	9.48	9.22	11.97	11.8	8.41	4.21
StET006662	ATATATATTGAGTAATG	TC213930	TC213930|-|weakly similar to UniRef100_A9RHN5 Cluster: Predicted protein; n=1; Physcomitrella patens subsp. patens|Rep: Predicted protein - Physcomitrella patens subsp. patens, partial (14%)|-|469-486|#|	0.308592	0.861275	1.23165	0.197802	0.640638	0.476472	-0.0311798	1	0.0753073	1	-0.842758	0.442988	0.110634	0.945066	-1.53145	0.010398	-1.43773	0.0181332	5.58	0	3.2	3.56	2.9	5.63	8.31	4.03	6.28	5.39	3.33	6.1	5.32	4.74	4.22	10.1	13.83	8.72	14.57	3.09	3.48	4.65	6.04	3.35	0	3.54	8.41	0
StET001667	AAGAAATTAACAAGTCT	TC214320	TC214320|-|homologue to UniRef100_P20346 Cluster: Probable protease inhibitor P322 precursor; n=1; Solanum tuberosum|Rep: Probable protease inhibitor P322 precursor - Solanum tuberosum (Potato), complete|-|448-464|#|TC218375|-|UniRef100_O49951 Cluster: Phosphoinositide-specific phospholipase C; n=1; Solanum tuberosum|Rep: Phosphoinositide-specific phospholipase C - Solanum tuberosum (Potato), par…	1.13583	0.747243	-1.22003	0.52338	-1.39536	0.436368	-1.53399	0.259811	-4.54586	0.00800113	-2.75401	0.174263	0.276344	1	-3.01348	0.0175049	-2.7354	0.0418925	2.65	0	5.59	0	0	0	7.39	0	0	29.65	0	4.88	3.99	0	0	0	0	2.18	0	0	0	0	0	8.38	0	0	0	0
StET004574	AGAAAGTTTTACAATGA	TC216234	TC216234|-|similar to UniRef100_Q8LFE2 Cluster: Photosystem II; n=1; Arabidopsis thaliana|Rep: Photosystem II - Arabidopsis thaliana (Mouse-ear cress), partial (49%)|-|509-525|#|	1.17595	0.696651	-1.13056	0.455593	-1.31272	0.361712	0.423051	0.968837	-1.20918	0.273328	-1.88203	0.173722	0.2974	0.91274	-1.8487	0.0120291	-1.53786	0.044125	2.68	0	7.19	0	2.9	0	2.77	0	0	2.7	28.3	4.88	1.33	0	0	0	1.84	1.45	0	6.19	2.32	2.33	1.72	1.68	0	0	0	0
StET009414	CAAAGTTAGTATTTCAA	TC216234	TC216234|-|similar to UniRef100_Q8LFE2 Cluster: Photosystem II; n=1; Arabidopsis thaliana|Rep: Photosystem II - Arabidopsis thaliana (Mouse-ear cress), partial (49%)|-|530-547|#|	-0.031725	1	-0.833894	0.427678	-0.674801	0.456936	-2.12147	0.00866173	0.082942	1	-1.22672	0.2625	0.153176	1	-1.46458	0.0147473	-1.31478	0.032054	4.29	3.39	7.99	2.14	6.76	7.51	4.62	0	2.51	0	9.99	11.58	3.32	0	6.32	1.84	0	4.36	3.64	3.09	3.48	3.49	5.17	5.03	8.55	2.95	0	0
StET025131	TGAAGTTAAATTTGTAA	TC218061	TC218061|-|similar to UniRef100_Q1KSI4 Cluster: Ubiqutin ligase; n=1; Phaseolus vulgaris|Rep: Ubiqutin ligase - Phaseolus vulgaris (Kidney bean) (French bean), partial (34%)|-|948-965|#|TC224066|-|similar to UniRef100_Q5JL96 Cluster: Zinc finger protein ZFP-like; n=1; Oryza sativa Japonica Group|Rep: Zinc finger protein ZFP-like - Oryza sativa subsp. japonica (Rice), partial (78%)|-|1598-1615|#|	3.51899	0.0861985	0.8416	0.668553	4.42939	0.00784555	2.93709	0.0195317	-1.61312	0.884428	-0.958986	1	0.256604	1	-4.12426	0.0122006	-3.89615	0.0204525	8.8	0	0	2.14	0	0	0	29.83	25.14	26.05	15.82	0	0	2.37	0	0	0	4.36	2.73	0	0	0	0	0	0	20.06	10.09	0
StET029340	TTTAATCTCTAGATATA	TC218352	TC218352|-|homologue to UniRef100_Q41229 Cluster: Photosystem I reaction center subunit IV B, chloroplast precursor (PSI-E B) [Contains: Photosystem I reaction center subunit IV B isoform 2]; n=3; Nicotiana sylvestris|Rep: Photosystem I reaction center subunit IV B, chloroplast precursor (PSI-E B) [Contains: Photosystem I reaction center subunit IV B isoform 2] - Nicotiana sylvestris (Wood tobacc…	0.302026	0.837943	0.35525	0.846281	-0.486867	0.570004	-1.45162	0.127643	-0.108265	1	-1.25884	0.00227075	-0.314931	0.724284	-1.2095	0.0248221	-1.53203	1.12870807244139e-11	18.49	15.25	17.58	13.53	17.39	11.27	21.24	9.67	10.06	17.07	16.65	35.36	23.27	2.37	10.54	11.01	23.98	25.42	40.06	7.73	18.55	22.09	21.55	20.12	30.78	12.98	5.89	14.75
StET029345	TTTAATCTCTAGTTACA	TC218352	TC218352|-|homologue to UniRef100_Q41229 Cluster: Photosystem I reaction center subunit IV B, chloroplast precursor (PSI-E B) [Contains: Photosystem I reaction center subunit IV B isoform 2]; n=3; Nicotiana sylvestris|Rep: Photosystem I reaction center subunit IV B, chloroplast precursor (PSI-E B) [Contains: Photosystem I reaction center subunit IV B isoform 2] - Nicotiana sylvestris (Wood tobacc…	-0.197807	0.962357	-0.0898742	1	-0.262214	0.870581	-1.47855	0.101859	-1.10849	0.293239	-1.81166	0.0220195	0.0568025	1	-1.49395	0.0143756	-1.42295	0.0320658	6.09	8.47	11.19	5.7	12.56	0	2.77	4.03	3.77	9.88	6.66	6.1	5.98	0	0	13.77	3.69	5.08	10.92	0	13.91	5.81	4.31	8.38	6.84	7.67	3.36	0
StET029336	TTTAATCTATAGTTATA	TC218352	TC218352|-|homologue to UniRef100_Q41229 Cluster: Photosystem I reaction center subunit IV B, chloroplast precursor (PSI-E B) [Contains: Photosystem I reaction center subunit IV B isoform 2]; n=3; Nicotiana sylvestris|Rep: Photosystem I reaction center subunit IV B, chloroplast precursor (PSI-E B) [Contains: Photosystem I reaction center subunit IV B isoform 2] - Nicotiana sylvestris (Wood tobacc…	-0.160667	0.982498	-0.260124	0.943507	-0.577087	0.380942	-0.945684	0.210419	-0.47109	0.971689	-1.16171	0.0713291	0.20839	0.983986	-1.44774	0.000524732	-1.23364	0.0424363	8.14	10.16	11.99	7.12	13.53	0	12.01	4.03	5.03	8.09	8.32	15.85	7.31	0	0	8.26	5.53	13.8	11.83	7.73	4.64	15.11	8.62	6.71	8.55	8.26	4.21	4.21
StET006917	ATCAAAATAGACTTCAG	TC219034	TC219034|-|similar to UniRef100_A7PXU4 Cluster: Chromosome chr15 scaffold_37, whole genome shotgun sequence; n=1; Vitis vinifera|Rep: Chromosome chr15 scaffold_37, whole genome shotgun sequence - Vitis vinifera (Grape), partial (79%)|-|812-829|#|TC224842|-|similar to UniRef100_A7PXU4 Cluster: Chromosome chr15 scaffold_37, whole genome shotgun sequence; n=1; Vitis vinifera|Rep: Chromosome chr15 sc…	-0.602961	0.71449	-0.401428	0.991424	-0.666898	0.569447	-1.05626	0.256787	-0.680922	0.486888	-1.5601	0.209264	0.0588662	1	-1.49279	0.0175049	-1.41197	0.0462776	3.21	0	6.39	1.42	7.73	0	5.54	0	0	3.59	2.5	4.88	2.66	0	0	0	0	2.18	10.01	4.64	9.27	5.81	0	3.35	0	2.95	1.68	0
StET019938	GTTTTGGAAAACTGATA	TC220151	TC220151|-|homologue to UniRef100_Q9LRR9 Cluster: Probable peroxisomal (S)-2-hydroxy-acid oxidase 2; n=2; Arabidopsis thaliana|Rep: Probable peroxisomal (S)-2-hydroxy-acid oxidase 2 - Arabidopsis thaliana (Mouse-ear cress), partial (98%)|-|1314-1331|#|	0.700682	0.721294	0.420171	0.914169	-0.0397772	1	-0.825912	0.370144	-0.105539	1	-0.985924	0.555379	-0.356389	0.890379	-1.56418	0.0239577	-1.9032	0.00766708	3.13	0	0	1.42	3.87	0	5.54	2.42	3.77	4.49	5.83	5.49	1.99	0	0	3.67	5.53	4.36	1.82	0	3.48	5.81	1.72	1.68	6.84	2.95	3.36	0
StET014215	GAATTGGAAAACTGATA	TC220151	TC220151|-|homologue to UniRef100_Q9LRR9 Cluster: Probable peroxisomal (S)-2-hydroxy-acid oxidase 2; n=2; Arabidopsis thaliana|Rep: Probable peroxisomal (S)-2-hydroxy-acid oxidase 2 - Arabidopsis thaliana (Mouse-ear cress), partial (98%)|-|1314-1331|#|	0.250293	0.947677	-0.422975	0.82761	-0.500495	0.627268	-1.08632	0.232644	-0.437247	0.765595	-1.74663	0.00596876	0.0180825	1	-1.64559	0.00270809	-1.62881	0.0374928	32.89	16.94	22.37	26.35	31.89	28.16	67.42	9.67	25.14	47.61	38.29	74.99	29.92	3.55	10.54	13.77	23.98	42.86	40.06	13.92	31.3	36.04	26.73	43.59	42.76	37.75	15.14	16.85
StET018495	GTATTGGAAAAATGATA	TC220151	TC220151|-|homologue to UniRef100_Q9LRR9 Cluster: Probable peroxisomal (S)-2-hydroxy-acid oxidase 2; n=2; Arabidopsis thaliana|Rep: Probable peroxisomal (S)-2-hydroxy-acid oxidase 2 - Arabidopsis thaliana (Mouse-ear cress), partial (98%)|-|1314-1331|#|	0.32227	0.917438	-0.397239	0.819537	-0.752824	0.346537	-0.952783	0.344925	-0.207352	0.829421	-1.64063	0.00228603	0.06505	1	-1.62754	0.000108448	-1.57856	0.00804661	8.13	3.39	7.99	4.27	9.66	11.27	13.85	2.42	5.03	9.88	19.98	16.46	7.31	0	4.22	8.26	3.69	6.54	11.83	0	10.43	8.14	9.48	6.71	11.97	8.26	2.52	4.21
StET006855	ATATTGGAAAACTGATA	TC220151	TC220151|-|homologue to UniRef100_Q9LRR9 Cluster: Probable peroxisomal (S)-2-hydroxy-acid oxidase 2; n=2; Arabidopsis thaliana|Rep: Probable peroxisomal (S)-2-hydroxy-acid oxidase 2 - Arabidopsis thaliana (Mouse-ear cress), partial (98%)|-|1314-1331|#|	0.355249	0.844998	0.00692647	1	0.812596	0.731178	-0.526996	0.547808	-0.592161	0.774702	-1.13831	0.38281	0.551686	0.742444	-1.96445	0.018982	-1.42702	0.0425617	3.65	3.39	2.4	4.27	2.9	3.76	6.46	5.64	2.51	8.98	3.33	4.88	3.32	0	4.22	0	5.53	7.26	2.73	0	0	3.49	1.72	2.52	6.84	5.31	0	0
StET015298	GATCCTATTAAAATTTA	TC220234	TC220234|-|homologue to UniRef100_Q43502 Cluster: Proteinase inhibitor type-2 CEVI57 precursor; n=1; Solanum lycopersicum|Rep: Proteinase inhibitor type-2 CEVI57 precursor - Solanum lycopersicum (Tomato) (Lycopersicon esculentum), partial (82%)|-|1105-1122|#|	0.146518	1	-0.0533557	1	-1.62061	0.205658	-1.07917	0.336315	-1.44835	0.459668	-2.69197	0.140689	-0.334297	0.846031	-2.11202	0.0395009	-2.4447	0.00635142	2.81	0	4.79	0	2.9	0	4.62	0	0	1.8	1.66	6.71	4.65	0	0	2.75	1.84	3.63	3.64	3.09	2.32	2.33	0	6.71	6.84	0	0	0
StET015302	GATCCTATTAAAGTTTA	TC220234	TC220234|-|homologue to UniRef100_Q43502 Cluster: Proteinase inhibitor type-2 CEVI57 precursor; n=1; Solanum lycopersicum|Rep: Proteinase inhibitor type-2 CEVI57 precursor - Solanum lycopersicum (Tomato) (Lycopersicon esculentum), partial (82%)|-|1105-1122|#|	-0.284269	1	0.120418	1	0.0247027	1	-1.74359	0.049881	0.65351	0.783649	-2.12005	0.0785055	-0.527476	0.661951	-1.7601	0.000477878	-2.27407	0.000563765	3.92	0	4.79	0	1.93	0	5.54	1.61	0	0	0	6.71	1.33	0	0	0	1.84	3.63	7.28	0	5.8	4.65	2.59	5.87	3.42	4.72	0	0
StET015273	GATCCTAATAAATTTTA	TC220234	TC220234|-|homologue to UniRef100_Q43502 Cluster: Proteinase inhibitor type-2 CEVI57 precursor; n=1; Solanum lycopersicum|Rep: Proteinase inhibitor type-2 CEVI57 precursor - Solanum lycopersicum (Tomato) (Lycopersicon esculentum), partial (82%)|-|1105-1122|#|	0.224985	0.988761	0.0319001	1	-1.31953	0.0440742	-2.49364	4.64644e-05	-1.08521	0.62592	-3.86015	0.0566515	-0.488991	0.706876	-1.80873	0.0144211	-2.27273	0.0118142	5.14	6.78	3.2	4.98	1.93	3.76	9.24	0	5.03	8.98	4.99	9.76	3.99	0	0	4.59	1.84	5.08	12.75	3.09	9.27	9.3	8.62	5.03	5.13	4.13	0	0
StET019414	GTTCCTATTAAATTTTA	TC220234	TC220234|-|homologue to UniRef100_Q43502 Cluster: Proteinase inhibitor type-2 CEVI57 precursor; n=1; Solanum lycopersicum|Rep: Proteinase inhibitor type-2 CEVI57 precursor - Solanum lycopersicum (Tomato) (Lycopersicon esculentum), partial (82%)|-|1105-1122|#|	-0.46847	0.814551	-0.820206	0.647661	-1.08578	0.207117	-1.80958	0.0231659	-1.46686	0.082389	-3.01821	0.000109336	-0.248342	0.899461	-1.79271	0.00414524	-2.03994	0.0129834	25.29	13.55	43.95	9.97	23.19	31.92	44.33	6.45	12.57	16.17	17.48	42.07	20.61	0	12.65	3.67	10.15	29.06	30.04	26.29	24.34	19.77	42.25	30.18	56.44	18.88	9.25	0
StET013724	GAACCTATTAAATTTTA	TC220234	TC220234|-|homologue to UniRef100_Q43502 Cluster: Proteinase inhibitor type-2 CEVI57 precursor; n=1; Solanum lycopersicum|Rep: Proteinase inhibitor type-2 CEVI57 precursor - Solanum lycopersicum (Tomato) (Lycopersicon esculentum), partial (82%)|-|1105-1122|#|	-0.378788	0.902323	-0.0717539	1	-1.19895	0.0269776	-2.34396	3.42654e-06	-0.963724	0.565711	-2.36338	7.37999e-05	0.0881123	1	-1.92382	8.45549e-09	-1.82511	0.00675682	8.84	5.08	6.39	9.97	6.76	13.14	19.39	3.22	3.77	6.29	3.33	21.34	5.98	0	4.22	3.67	17.52	11.62	16.39	12.37	10.43	11.63	6.04	6.71	13.68	2.95	3.36	4.21
StET016622	GCTCCTATTAAATTTTA	TC220234	TC220234|-|homologue to UniRef100_Q43502 Cluster: Proteinase inhibitor type-2 CEVI57 precursor; n=1; Solanum lycopersicum|Rep: Proteinase inhibitor type-2 CEVI57 precursor - Solanum lycopersicum (Tomato) (Lycopersicon esculentum), partial (82%)|-|1105-1122|#|	-0.606108	0.699765	-0.54378	0.722608	-0.558214	0.385255	-1.92536	0.00694441	-1.49426	0.10711	-2.04798	0.0332415	-0.0361627	1	-1.66017	0.00238343	-1.70092	0.0465314	19.11	11.86	27.17	7.83	22.22	26.29	38.79	9.67	8.8	14.37	12.49	31.1	8.64	2.37	12.65	12.85	9.22	20.34	29.13	15.46	27.82	15.11	18.97	31.02	30.78	18.29	12.62	16.85
StET015280	GATCCTATAAAATTTTA	TC220234	TC220234|-|homologue to UniRef100_Q43502 Cluster: Proteinase inhibitor type-2 CEVI57 precursor; n=1; Solanum lycopersicum|Rep: Proteinase inhibitor type-2 CEVI57 precursor - Solanum lycopersicum (Tomato) (Lycopersicon esculentum), partial (82%)|-|1105-1122|#|	-0.110266	1	-0.238453	0.895083	-0.442212	0.710815	-1.377	0.0363429	-0.673452	0.603792	-2.11503	0.00300967	0.281925	0.807155	-1.78031	2.02412e-06	-1.55721	0.0289619	6.2	5.08	6.39	2.14	10.63	13.14	8.31	6.45	11.31	4.49	4.16	10.37	3.32	0	0	10.1	3.69	7.99	9.1	4.64	6.96	6.98	6.04	7.55	0	5.9	1.68	4.21
StET014388	GACCCTATTAAATTTTA	TC220234	TC220234|-|homologue to UniRef100_Q43502 Cluster: Proteinase inhibitor type-2 CEVI57 precursor; n=1; Solanum lycopersicum|Rep: Proteinase inhibitor type-2 CEVI57 precursor - Solanum lycopersicum (Tomato) (Lycopersicon esculentum), partial (82%)|-|1105-1122|#|	-0.542098	0.793144	-1.07713	0.343604	-0.836585	0.301879	-1.88042	0.00605108	-0.847606	0.481953	-1.79105	0.0809444	0.0519018	1	-1.39288	0.0101458	-1.34689	0.0377328	13.51	11.86	16.78	8.54	20.29	20.65	27.71	2.42	7.54	11.68	9.99	30.49	6.65	0	4.22	7.34	3.69	15.25	13.66	9.28	26.66	9.3	20.69	18.44	17.1	12.98	3.36	14.75
StET017895	GGTCCTATTAAATTTTA	TC220234	TC220234|-|homologue to UniRef100_Q43502 Cluster: Proteinase inhibitor type-2 CEVI57 precursor; n=1; Solanum lycopersicum|Rep: Proteinase inhibitor type-2 CEVI57 precursor - Solanum lycopersicum (Tomato) (Lycopersicon esculentum), partial (82%)|-|1105-1122|#|	-0.466854	0.748377	-1.06655	0.293803	-0.563934	0.457957	-1.80587	0.00913504	-1.22917	0.0773789	-2.59078	1.46146e-05	0.297252	0.694482	-1.42645	4.88774e-05	-1.14087	0.0135473	20.73	25.41	30.37	17.09	31.89	35.67	42.48	7.26	26.39	18.87	12.49	43.29	18.62	2.37	8.43	11.01	9.22	19.61	29.13	17.01	31.3	13.95	31.9	28.5	23.94	23.6	9.25	12.64
StET004468	ACTTTAAACTAACAGCT	TC220649	TC220649|-|similar to UniRef100_Q6QPJ6 Cluster: Peroxiredoxin Q, chloroplast precursor; n=2; Populus trichocarpa x Populus deltoides|Rep: Peroxiredoxin Q, chloroplast precursor - Populus jackii (Balm of Gilead) (Populus trichocarpa x Populusdeltoides), partial (86%)|-|762-778|#|	1.30499	0.491342	-0.702604	0.797767	-0.197162	1	3.07332	0.148776	-2.96911	0.489207	-3.30371	0.833261	0.57851	0.81375	-3.94539	0.00980038	-3.41469	0.0437625	2.86	0	4	0	0	0	0	0	6.28	0	9.16	4.88	2.66	0	0	0	0	0	0	0	0	0	0	0	0	0	0	0
StET014291	GACAATAAAATGGTGAA	TC223341	TC223341|-|homologue to UniRef100_A5BE19 Cluster: Phosphoribulokinase; n=1; Vitis vinifera|Rep: Phosphoribulokinase - Vitis vinifera (Grape), partial (93%)|-|1500-1517|#|	0.500628	0.894972	0.135517	1	-0.107012	0.899272	-0.796413	0.509455	-0.190451	0.853169	-2.13958	0.0142724	-0.722537	0.731972	-1.57705	0.00195662	-2.35616	0.00049697	4.07	3.39	0	2.14	2.9	9.39	1.85	4.03	0	2.7	3.33	4.88	6.65	0	0	6.42	1.84	2.18	4.55	4.64	0	6.98	5.17	4.19	6.84	7.08	4.21	0
StET015006	GATAATAAAACGGTGAA	TC223341	TC223341|-|homologue to UniRef100_A5BE19 Cluster: Phosphoribulokinase; n=1; Vitis vinifera|Rep: Phosphoribulokinase - Vitis vinifera (Grape), partial (93%)|-|1500-1517|#|	-0.02784	1	-0.22916	0.920992	-0.459712	0.756469	0.234699	0.980505	-0.129567	0.958618	-0.921935	0.988583	0.257181	0.862672	-1.9113	0.000145758	-1.65106	0.00618184	4.04	3.39	4	2.14	5.8	0	6.46	0	6.28	0	4.16	5.49	5.32	0	4.22	6.42	1.84	2.91	3.64	0	4.64	0	4.31	5.03	0	1.18	2.52	0
StET015028	GATAATATAATGGTGAA	TC223341	TC223341|-|homologue to UniRef100_A5BE19 Cluster: Phosphoribulokinase; n=1; Vitis vinifera|Rep: Phosphoribulokinase - Vitis vinifera (Grape), partial (93%)|-|1500-1517|#|	-0.178081	0.979676	0.0926514	1	-0.868229	0.423212	-0.631684	0.46934	-0.0274698	1	-2.80005	0.027299	-0.337643	0.903261	-1.29535	0.0384098	-1.64466	0.0100818	3.57	6.78	3.2	0	5.8	0	4.62	0	0	3.59	4.16	6.1	1.99	0	0	2.75	0	5.08	9.1	3.09	2.32	4.65	5.17	4.19	8.55	0	2.52	0
StET003547	ACAACTAATAATAGTAA	TC223622	TC223622|-|UniRef100_P26577 Cluster: Ribulose bisphosphate carboxylase small chain 2C, chloroplast precursor; n=1; Solanum tuberosum|Rep: Ribulose bisphosphate carboxylase small chain 2C, chloroplast precursor - Solanum tuberosum (Potato), complete|-|670-687|#|	-0.175526	1	0.11812	1	-0.95954	0.368775	-1.18036	0.318881	-0.952479	0.651849	-3.30922	0.228166	-0.819574	0.593294	-2.2697	0.0206802	-3.03517	0.00270774	2.56	0	3.2	0	1.93	0	2.77	0	2.51	0	4.99	1.83	0	0	0	0	0	5.81	0	0	8.11	2.33	4.31	2.52	0	0	0	0
StET004665	AGAACTAATCATAGTAA	TC223622	TC223622|-|UniRef100_P26577 Cluster: Ribulose bisphosphate carboxylase small chain 2C, chloroplast precursor; n=1; Solanum tuberosum|Rep: Ribulose bisphosphate carboxylase small chain 2C, chloroplast precursor - Solanum tuberosum (Potato), complete|-|670-687|#|	0.447791	0.939641	0.0291858	1	-1.54699	0.105346	-2.25609	0.00945382	-1.41264	0.300794	-2.65941	0.199868	-1.40365	0.260044	-1.58164	0.0389609	-2.99699	0.0157493	11.81	0	15.18	0	5.8	5.63	13.85	0	5.03	3.59	18.31	21.34	7.98	0	0	0	5.53	22.52	7.28	10.82	27.82	23.25	14.66	11.74	30.78	2.36	4.21	0
StET005807	AGTACTAATAATAGTAA	TC223622	TC223622|-|UniRef100_P26577 Cluster: Ribulose bisphosphate carboxylase small chain 2C, chloroplast precursor; n=1; Solanum tuberosum|Rep: Ribulose bisphosphate carboxylase small chain 2C, chloroplast precursor - Solanum tuberosum (Potato), complete|-|670-687|#|	0.606013	0.876336	0.00736888	1	-1.34273	0.159582	-2.52322	7.59307e-07	-1.07927	0.616064	-3.12093	0.057231	-1.01916	0.342836	-1.87772	0.000111911	-2.92513	0.00527089	9.74	0	15.98	2.14	5.8	0	10.16	0	2.51	7.19	17.48	22.56	5.32	0	0	0	2.77	15.98	10.92	23.2	15.07	16.28	11.21	6.71	11.97	1.77	1.68	0
StET004616	AGAACGAATAATAGTAA	TC223622	TC223622|-|UniRef100_P26577 Cluster: Ribulose bisphosphate carboxylase small chain 2C, chloroplast precursor; n=1; Solanum tuberosum|Rep: Ribulose bisphosphate carboxylase small chain 2C, chloroplast precursor - Solanum tuberosum (Potato), complete|-|670-687|#|	0.265158	1	-0.034998	1	-1.11977	0.253408	-1.99184	6.11695e-05	-1.46003	0.453958	-4.5134	0.000106886	-0.687339	0.546274	-2.01215	2.39487e-06	-2.77536	0.00455829	6.65	0	11.19	0	7.73	0	8.31	0	3.77	3.59	10.82	14.63	3.32	0	0	0	1.84	12.35	9.1	4.64	11.59	10.46	9.48	10.06	6.84	1.18	1.68	0
StET004809	AGAATTAATAATAGTAA	TC223622	TC223622|-|UniRef100_P26577 Cluster: Ribulose bisphosphate carboxylase small chain 2C, chloroplast precursor; n=1; Solanum tuberosum|Rep: Ribulose bisphosphate carboxylase small chain 2C, chloroplast precursor - Solanum tuberosum (Potato), complete|-|670-687|#|	-0.0329821	1	-0.553647	0.821255	-0.620908	0.614432	-1.97673	0.00029044	-1.22311	0.552547	-2.25554	0.113323	-0.964095	0.284056	-1.61068	0.0118929	-2.57811	0.0115038	5.27	0	5.59	0	2.9	5.63	8.31	0	2.51	2.7	5.83	8.54	2.66	0	0	0	0	6.54	3.64	9.28	10.43	8.14	6.9	5.03	10.26	1.18	0	0
StET004689	AGAACTTATAATAGTAA	TC223622	TC223622|-|UniRef100_P26577 Cluster: Ribulose bisphosphate carboxylase small chain 2C, chloroplast precursor; n=1; Solanum tuberosum|Rep: Ribulose bisphosphate carboxylase small chain 2C, chloroplast precursor - Solanum tuberosum (Potato), complete|-|670-687|#|	0.019355	1	-0.384526	0.962634	-0.792189	0.502326	-2.23799	6.11695e-05	-0.919026	0.564686	-2.87678	0.210234	-0.55081	0.66532	-1.8399	0.00103956	-2.4192	0.0174552	8.24	0	12.79	2.14	4.83	9.39	12.01	0	2.51	7.19	7.49	21.34	1.99	0	0	0	0	17.43	6.37	7.73	8.11	9.3	17.24	11.74	8.55	2.36	1.68	0
StET004638	AGAACTAATAATACTAA	TC223622	TC223622|-|UniRef100_P26577 Cluster: Ribulose bisphosphate carboxylase small chain 2C, chloroplast precursor; n=1; Solanum tuberosum|Rep: Ribulose bisphosphate carboxylase small chain 2C, chloroplast precursor - Solanum tuberosum (Potato), complete|-|670-687|#|	-0.992387	0.631608	-0.548249	0.70449	-1.24178	0.0580393	-2.15875	0.00194614	-1.34609	0.55022	-3.27487	0.075821	-1.03286	0.2642	-1.33579	0.0396298	-2.40719	0.00489348	3.03	0	6.39	1.42	3.87	3.76	0	0	2.51	1.8	1.66	2.44	0	0	0	0	0	4.36	1.82	6.19	9.27	8.14	5.17	5.03	3.42	2.95	0	0
StET004668	AGAACTAATTATAGTAA	TC223622	TC223622|-|UniRef100_P26577 Cluster: Ribulose bisphosphate carboxylase small chain 2C, chloroplast precursor; n=1; Solanum tuberosum|Rep: Ribulose bisphosphate carboxylase small chain 2C, chloroplast precursor - Solanum tuberosum (Potato), complete|-|670-687|#|	-0.536616	0.897771	-1.25936	0.418145	-0.655627	0.574722	-2.00409	0.00540916	-0.842148	0.583088	-3.94205	4.32063e-06	-0.363269	0.869211	-1.86429	2.69375e-05	-2.2287	0.0292554	4.84	0	7.19	1.42	4.83	0	12.93	1.61	0	3.59	3.33	9.15	1.33	0	0	0	0	4.36	2.73	6.19	9.27	4.65	11.21	1.68	8.55	3.54	0	0
StET004625	AGAACTAAGAATAGTAA	TC223622	TC223622|-|UniRef100_P26577 Cluster: Ribulose bisphosphate carboxylase small chain 2C, chloroplast precursor; n=1; Solanum tuberosum|Rep: Ribulose bisphosphate carboxylase small chain 2C, chloroplast precursor - Solanum tuberosum (Potato), complete|-|670-687|#|	-0.546775	0.875703	-0.967783	0.603808	-1.09376	0.28481	-1.86956	0.00184167	-1.14124	0.696339	-3.87768	0.0414329	-0.255231	0.897443	-1.81182	0.00654595	-2.13658	0.0491248	4.72	0	11.19	2.85	4.83	0	9.24	0	0	1.8	7.49	7.93	1.99	0	0	0	0	7.26	2.73	10.82	9.27	4.65	4.31	6.71	6.84	0	0	0
StET004646	AGAACTAATAATAGTCA	TC223622	TC223622|-|UniRef100_P26577 Cluster: Ribulose bisphosphate carboxylase small chain 2C, chloroplast precursor; n=1; Solanum tuberosum|Rep: Ribulose bisphosphate carboxylase small chain 2C, chloroplast precursor - Solanum tuberosum (Potato), complete|-|670-687|#|	-0.117019	1	-0.779978	0.579978	-0.386924	0.8374	-2.24399	0.000176718	-1.69883	0.502485	-3.0789	0.216358	-0.203586	0.83855	-1.79953	0.0189287	-2.04213	0.03259	5.02	0	5.59	4.27	5.8	5.63	10.16	0	3.77	3.59	4.16	12.8	3.99	0	0	0	1.84	8.72	2.73	6.19	6.96	5.81	5.17	6.71	10.26	2.95	0	0
StET009764	CAATACCAACAACGACA	TC225856	TC225856|-|weakly similar to UniRef100_Q05164 Cluster: Haze protective factor 1 precursor; n=1; Saccharomyces cerevisiae|Rep: Haze protective factor 1 precursor - Saccharomyces cerevisiae (Baker's yeast), partial (5%)|-|1107-1124|#|	-0.423512	0.967765	1.46351	0.506136	2.25777	0.237102	0.886177	0.637978	-0.0237692	1	-3.31543	0.432009	0.715967	0.725669	-3.95157	0.00188922	-3.28059	0.0158171	3.43	0	4.79	0	0	0	0	0	0	0	0	0	3.32	0	0	0	23.06	2.18	0	0	0	0	0	0	0	0	22.71	0
StET000477	AAAATTTATCAAAAAAA	unknown		2.02346	0.391831	2.32242	0.3044	0.761773	0.76626	2.57471	0.135664	-4.05602	0.273328	-3.10017	0.715609	0.492942	1	-3.4685	0.0177874	-3.08489	0.0496008	4.35	0	4.79	0	0	0	0	12.09	0	0	14.15	0	13.96	0	40.05	0	0	13.8	0	0	0	0	0	0	3.42	0	7.57	0
StET000623	AAAGAAAAAAATCAAAA	unknown		0.295371	1	0.0341756	1	2.35692	0.1657	2.38935	0.15194	1.28521	0.850091	-1.40088	0.894147	-0.158269	1	-2.87149	0.0460554	-2.99998	0.0443581	2.96	0	0	0	0	0	0	0	0	0	0	3.05	0	0	0	0	0	0	0	0	0	0	0	0	0	10.62	0	0
StET000671	AAAGATTTACTAAAAAA	unknown		3.1421	0.180221	0.905005	0.715806	1.22342	0.380254	1.86924	0.245433	0.0341512	1	-1.27219	1	-0.158269	1	-3.34728	0.0358864	-3.4673	0.0475352	3.53	0	0	0	0	0	0	0	0	27.85	22.48	3.05	1.99	0	0	0	0	4.36	0	0	0	0	0	0	0	0	5.89	8.43
StET001101	AAATTTGTCCATTAAAA	unknown		3.28216	0.000325971	2.18596	0.162372	-0.197162	1	-0.284468	1	-0.0872982	1	-2.54202	0.545379	-0.158269	1	-3.16773	0.0134043	-3.29635	0.0193023	2.94	0	0	0	0	0	0	1.61	16.34	11.68	12.49	9.15	8.64	11.85	0	0	8.3	4.36	0	0	0	0	0	0	0	0	0	0
StET001570	AACTTATTTTCAAAAAA	unknown		1.20977	0.763173	1.44654	0.473682	3.01996	0.146987	1.03258	0.530978	-4.6597	0.000168865	-1.94512	0.171117	-0.158269	1	-4.30765	7.0666e-08	-4.45301	9.41673291654136e-08	3.31	0	0	0	0	0	0	0	13.83	0	0	0	0	11.85	0	0	0	1.45	0	0	0	0	0	0	0	0	5.89	0
StET002641	AATCAATATCTCTTCTT	unknown		1.42725	0.68572	1.89002	0.38578	-0.197162	1	3.25226	0.091414	-3.54792	0.18049	-2.62121	0.44488	-0.158269	1	-3.24114	0.0080832	-3.37194	0.0100818	2.71	0	0	0	0	0	0	0	0	14.37	0	0	0	0	0	18.35	0	0	0	0	0	0	0	0	0	0	0	0
StET003094	AATTAATTGATATTTTA	unknown		-0.302726	1	0.924729	0.76067	-0.00363257	1	0.908458	0.64069	-0.471691	1	-2.22645	0.175287	0.607926	0.91274	-3.69852	0.000741387	-3.07141	0.0356141	7.06	0	8.79	0	0	0	12.01	0	0	10.78	0	0	7.31	0	0	30.29	0	7.99	8.19	0	0	9.3	0	0	5.13	0	11.78	0
StET003101	AATTACTCTTGAAAAAA	unknown		-0.552466	0.814457	2.13729	0.443674	2.39111	0.168652	2.58904	0.129494	-3.58061	0.291601	-2.63387	0.636058	-0.158269	1	-3.27511	0.0211932	-3.3968	0.0288153	2.76	0	0	0	0	0	0	0	0	0	0	0	0	0	29.51	0	0	0	0	0	0	0	0	0	0	0	15.98	0
StET003303	AATTTATACAAGAAAAA	unknown		1.94826	0.572448	2.70976	0.244654	-0.197162	1	1.75413	0.35558	-3.20115	0.441048	-3.38177	0.988583	-0.158269	1	-4.02911	0.0120225	-4.14272	0.0181332	2.71	0	0	0	0	0	0	15.32	0	0	0	6.1	0	0	0	0	0	5.81	25.49	0	0	0	0	0	0	0	0	0
StET005005	AGATAGCACATTAAAAA	unknown		3.10656	0.0849348	2.07178	0.431507	1.67036	0.452953	-0.284468	1	-2.80873	0.491365	-3.51643	0.55311	-0.158269	1	-4.16516	0.00325375	-4.28266	0.00523705	3.26	0	0	0	0	0	0	6.45	0	0	19.15	15.85	7.98	0	0	0	0	17.43	0	0	0	0	0	0	0	0	0	21.07
StET005470	AGCTTCTGAAGATTATA	unknown		1.20977	0.763173	0.0341756	1	1.44243	0.461057	1.93276	0.322418	-2.61882	0.655252	-4.91009	0.754937	-0.158269	1	-5.56931	0.00023122	-5.67939	0.000519239	4.62	0	0	0	0	0	0	0	13.83	0	0	0	0	0	0	0	0	0	0	0	0	0	0	0	0	10.62	0	0
StET005778	AGTAAATATACATATGT	unknown		1.90818	0.506617	2.13539	0.253239	-0.197162	1	1.56675	0.345543	-2.83709	0.0449838	-3.63256	0.0416897	0.579995	0.81375	-4.16578	1.37748e-07	-3.55752	0.000125758	3.63	0	0	0	0	0	4.62	0	18.85	18.87	0	0	2.66	14.22	0	0	10.15	1.45	16.39	0	0	0	0	0	0	0	0	0
StET006304	ATAAGCACAACTTTATA	unknown		4.01818	0.00915615	3.9874	0.00289895	1.22837	0.565338	1.92938	0.230431	0.786705	0.767732	-3.74794	0.199914	0.57851	0.81375	-4.33058	4.76474e-05	-3.78516	0.00078917	11.91	0	4	0	0	0	0	0	61.59	21.56	49.95	7.93	23.27	20.14	63.23	35.79	37.81	12.35	0	0	0	0	0	0	0	0	0	0
StET008117	ATGTGAAAAAAAAAAAA	unknown		0.617372	0.893076	1.96995	0.130126	1.59674	0.227608	3.1842	1.88109e-05	-1.64124	0.511421	-0.102287	1	-0.158358	1	-2.39357	0.027563	-2.55213	0.023912	4.32	0	0	1.42	1.93	0	0	0	2.51	0	1.66	3.66	1.99	3.55	4.22	13.77	4.61	4.36	0	3.09	0	0	0	1.68	0	8.26	1.68	12.64
StET008440	ATTATGTAATAAATTGA	unknown		0.963459	0.838882	1.46966	0.49671	-0.197162	1	-0.284468	1	-5.39585	0.203128	-2.46903	1	0.426804	0.81375	-5.08786	0.00157568	-4.60126	0.0106407	3.37	0	0	0	0	0	3.69	11.29	0	0	0	4.27	0	20.14	0	0	0	2.91	0	0	0	0	0	0	0	0	0	0
StET010275	CAGCTCCAGAGTACAAA	unknown		1.67983	0.338445	1.55008	0.575464	1.01035	0.694067	-1.48494	0.252352	-2.39916	0.302877	0.89571	0.745094	-0.435298	0.985971	-2.53094	0.0398099	-2.95686	0.00949804	4.63	0	1.6	0	0	0	4.62	8.06	15.08	8.98	0	3.66	1.99	0	35.83	0	0	0	0	0	0	0	0	6.71	3.42	0	0	0
StET011681	CGTTCTACGTAAAAAAA	unknown		1.34971	0.553283	0.491339	0.904336	-0.197162	1	-0.284468	1	-2.15941	0.564781	-3.43657	0.0981186	1.16355	0.410652	-3.97821	1.04e-05	-2.83891	0.00377679	2.61	0	4.79	0	0	0	4.62	6.45	0	0	19.15	7.32	2.66	0	0	0	13.83	2.18	0	0	0	0	0	0	0	0	0	0
StET012463	CTGCAACAAAAAAAAAA	unknown		2.23173	0.212527	2.67318	0.137194	0.317516	1	2.26055	0.156058	-1.52081	0.616064	-0.664992	0.988583	0.204049	1	-2.61452	0.0288459	-2.45216	0.0400454	4	0	3.2	0	0	0	0	0	18.85	0	5.83	10.37	5.98	4.74	21.08	28.45	0	5.81	0	0	0	0	0	0	3.42	0	0	0
StET012662	CTGTCCCCTCAGGTAGA	unknown		-0.225889	0.919467	-0.757691	0.357994	0.272989	0.800521	0.209587	0.825529	0.133559	1	1.73674	0.23801	0.10167	0.947325	1.48836	0.00868647	1.606	0.0193466	54.01	77.92	55.94	84.02	46.38	90.12	37.86	82.23	101.81	59.29	54.94	15.24	25.93	69.9	29.51	67.91	25.82	31.96	8.19	91.23	42.89	48.83	57.76	74.61	46.18	39.52	59.72	29.49
StET013482	GAAACACCCATTGTAGA	unknown		1.91904	0.48747	-0.380769	0.991171	3.46732	0.0589316	2.16482	0.214575	-4.24245	0.29016	-3.28264	0.791577	0.0343346	1	-3.7238	0.00883576	-3.67426	0.0195775	4.54	0	2.4	0	0	0	0	4.03	22.62	0	0	4.88	0	0	0	0	0	0	0	0	0	0	0	1.68	0	8.26	0	33.71
StET014079	GAATATTGATACATTGA	unknown		1.25886	0.566874	-0.135681	1	2.54937	0.273882	1.4382	0.427713	-1.90848	0.693762	-2.92024	0.627454	0.426554	0.91274	-4.02888	0.00559938	-3.62652	0.0168946	3.04	0	3.2	0	0	0	0	0	5.03	0	0	6.1	6.65	0	0	0	0	2.18	0	0	0	0	0	0	0	0	0	40.03
StET014265	GACAAAGTTCCTATTAT	unknown		2.91659	0.173283	1.07174	0.641007	-0.197162	1	-0.284468	1	-1.06122	0.930697	-3.38624	0.988583	0.740635	0.67612	-4.80238	0.00356411	-4.02563	0.0394622	5.17	0	0	0	0	0	5.54	15.32	45.25	0	0	19.51	8.64	8.29	0	0	0	10.17	0	0	0	0	0	0	0	0	0	0
StET014285	GACAAGGCTCAAATAGC	unknown		-0.0244629	1	0.394338	0.916521	-1.09609	0.411695	-1.2396	0.114364	-1.58217	0.0479049	-2.93839	0.0337716	-0.652799	0.521397	-1.59454	0.0493274	-2.2722	0.000318179	2.64	0	3.2	1.42	1.93	0	4.62	1.61	3.77	4.49	4.16	1.83	0	0	0	0	4.61	0	9.1	9.28	5.8	4.65	2.59	0	3.42	0	0	0
StET015106	GATATATATTTGGTTCA	unknown		2.07405	0.40138	1.8385	0.401349	-0.197162	1	4.13216	0.00340394	0.445315	1	-2.81225	0.466233	-0.158269	1	-3.43838	0.00537812	-3.56585	0.00888743	5.14	0	0	0	0	0	0	13.7	0	0	0	5.49	3.32	0	0	17.44	0	0	0	0	0	0	0	0	0	0	0	0
StET015212	GATCATATTAAATTTTT	unknown		-0.755885	0.667257	-0.412479	0.795627	-0.516922	0.843116	-1.01498	0.35558	-1.88691	0.0614063	-2.70932	0.0910869	0.475746	0.8147	-2.56997	0.000404336	-2.09398	0.0221721	2.77	0	3.2	1.42	2.9	7.51	7.39	0	0	4.49	0	3.05	2.66	0	0	1.84	2.77	3.63	4.55	0	0	0	2.59	5.03	5.13	1.77	0	0
StET015221	GATCCAATTAAAAAAAA	unknown		0.11907	1	-0.488016	0.773421	-0.645503	0.595735	-1.66313	0.0323732	-0.517324	0.919998	-2.35004	0.0121065	-0.0511262	1	-1.72188	0.000940011	-1.7661	0.00349247	4.49	5.08	4.79	2.85	2.9	7.51	7.39	0	3.77	2.7	5.83	12.8	3.99	0	4.22	0	4.61	1.45	8.19	9.28	4.64	4.65	6.04	1.68	5.13	3.54	0	0
StET015229	GATCCCATTAAAAAAAA	unknown		-0.364743	0.813607	-1.07617	0.171886	-0.422845	0.511418	-1.27606	0.0861208	-1.15105	0.576707	-2.764	0.00371121	0.435546	0.42299	-1.70623	0.000212565	-1.23172	0.0409584	10.69	22.02	17.58	7.12	15.46	16.9	16.62	9.67	8.8	10.78	9.16	25	5.32	0	8.43	6.42	3.69	10.9	10.92	12.37	17.39	6.98	12.07	8.38	10.26	10.03	4.21	6.32
StET015303	GATCCTATTAAATAAAA	unknown		0.732818	0.738569	-0.217743	0.993331	-0.993563	0.237102	-1.32937	0.201012	-1.30616	0.680506	-3.0314	0.0282108	-0.623777	0.62214	-1.6869	0.0366539	-2.3156	0.0140007	9.06	3.39	7.99	2.85	6.76	5.63	16.62	4.84	5.03	24.26	2.5	21.34	12.63	0	6.32	4.59	0	8.72	13.66	7.73	8.11	8.14	8.62	15.93	20.52	8.85	1.68	0
StET015349	GATCCTTTTAAAAAAAA	unknown		0.0440945	1	-0.69645	0.666765	-0.849741	0.506627	-1.83407	0.00316451	-1.45664	0.63639	-2.36468	0.126622	-0.450838	0.783671	-1.73108	0.0346005	-2.17454	0.017089	8.72	8.47	7.99	3.56	5.8	7.51	16.62	0	5.03	2.7	8.32	21.34	9.97	0	10.54	0	3.69	6.54	8.19	9.28	26.66	9.3	7.76	10.06	6.84	2.95	1.68	4.21
StET016919	GCTTTTGTGTTTCTATC	unknown		1.96455	0.59147	2.59608	0.106426	2.63359	0.0904813	2.99309	0.012054	-1.32305	0.72604	-0.140297	1	-0.158269	1	-3.31079	0.0123912	-3.43599	0.018833	4.43	0	0	0	0	0	0	0	25.14	0	0	0	0	7.11	0	11.93	0	2.91	10.92	0	0	0	0	0	0	14.16	4.21	0
StET018570	GTCAATGGTAAAATTTT	unknown		1.61132	0.319305	1.36491	0.551644	1.1247	0.672871	1.01582	0.664311	-1.4299	0.630288	-4.33878	0.00413368	-0.844858	0.786787	-3.34701	0.0080832	-4.18918	3.20039212512083e-08	5.54	0	4.79	0	0	0	0	7.26	0	8.98	0	7.32	5.98	0	0	0	0	2.18	17.3	0	0	0	0	11.74	0	0	0	0
StET018708	GTCTAACTCTAGTTGAG	unknown		-0.552466	0.814457	3.94605	0.0726058	-0.197162	1	-0.284468	1	-1.68915	0.667929	-2.51742	0.725532	-0.158269	1	-3.16338	0.0328262	-3.2848	0.0459496	2.87	0	0	0	0	0	0	0	0	0	0	0	0	0	0	20.19	59.95	0	16.39	0	0	0	0	0	0	0	0	0
StET019094	GTGTAGTAATCTTGTTA	unknown		2.29954	0.474806	2.12675	0.329793	-0.197162	1	1.41675	0.400872	-4.34986	2.31371e-08	-3.49153	0.00162857	1.10394	0.571654	-3.99235	2.66286e-12	-2.87286	0.0015239	4.48	0	7.99	0	0	0	0	0	20.11	41.32	0	7.93	0	0	42.16	0	0	5.81	13.66	0	0	0	0	0	0	0	0	0
StET019413	GTTCCTATTAAAAAAAA	unknown		-0.364413	0.876244	-0.957559	0.509421	-0.492566	0.489754	-1.12581	0.143459	-1.35406	0.616064	-3.36247	0.000109682	0.00172185	1	-1.8179	1.01979e-05	-1.80949	0.000778201	20.37	23.71	29.57	14.24	15.46	28.16	30.48	5.64	10.06	11.68	30.8	39.63	7.31	0	4.22	6.42	5.53	14.53	32.77	30.93	15.07	22.09	28.45	21.8	22.23	22.42	9.25	6.32
StET019424	GTTCGACTTATTAGGAC	unknown		2.86106	0.185404	0.619225	0.797767	-0.197162	1	1.95827	0.219397	-1.82132	0.681608	-1.5245	1	-0.158269	1	-3.41573	0.0279609	-3.5355	0.0396238	2.57	0	0	0	0	0	0	0	11.31	0	26.64	4.27	3.32	4.74	0	0	0	0	0	0	0	0	0	0	0	0	0	0
StET019870	GTTTGTTCGTCTCACAC	unknown		0.670457	0.863599	1.20893	0.566941	1.61834	0.43589	0.088194	1	0.0534158	1	-3.1052	0.00292598	1.10702	0.548526	-3.18672	1.93051e-08	-2.0237	4.86181245599442e-05	4.01	0	4	4.27	0	0	5.54	0	0	0	0	15.85	7.31	3.55	0	23.86	0	11.62	0	0	0	0	0	0	5.13	0	4.21	0
StET020188	TAAACTTGTATGTTAGT	unknown		1.91656	0.552655	1.25474	0.63961	2.06757	0.234746	2.44101	0.0903587	-4.32568	0.271977	-1.92818	0.988583	0.426554	0.91274	-4.00839	0.00834596	-3.60951	0.023427	3.41	0	3.2	0	0	0	0	0	0	22.46	0	8.54	0	0	0	0	0	0	13.66	0	0	0	0	0	0	5.31	0	0
StET022894	TATCACCTATCTCAAGA	unknown		-1.28925	0.565091	0.484102	0.844815	-0.197162	1	-0.284468	1	-1.66316	0.767278	-3.74341	0.122288	0.57851	0.81375	-4.83248	6.91755e-06	-4.28852	0.000145844	2.56	0	4	0	0	0	0	0	0	0	0	0	0	0	0	0	0	6.54	0	0	0	0	0	0	0	0	0	0
StET024314	TCCCTCAAAAAAAAAAA	unknown		0.384377	1	1.23746	0.576452	-0.419668	0.963764	3.54917	0.0228669	-0.097082	1	-1.25787	0.726931	0.356219	1	-2.75473	0.0218763	-2.40708	0.040862	3.98	0	0	1.42	0	0	3.69	0	0	0	0	0	7.98	0	0	17.44	0	2.18	0	0	0	0	0	0	3.42	0	0	0
StET024316	TCCCTCATTTTGGTTTC	unknown		0.295466	1	2.11504	0.418145	-0.822578	0.697099	2.09135	0.22133	0.817745	1	-1.76955	0.42337	-0.790577	0.782508	-3.04151	0.0175049	-3.89852	0.000200339	3.97	0	0	0	0	0	0	0	0	0	0	0	2.66	0	0	0	0	18.16	0	0	0	0	0	0	6.84	0	0	0
StET024451	TCGAGTATTATGTAGTT	unknown		2.08273	0.568796	0.607062	0.894743	-1.97916	0.240128	-0.124147	1	-1.40712	0.826114	-2.58171	1	-0.836121	0.783671	-5.74168	0.0015986	-6.58561	8.51127634369834e-05	20.93	0	0	7.12	0	0	0	0	21.37	35.93	0	0	0	16.59	0	0	0	0	0	0	0	0	0	13.41	5.13	0	0	0
StET024726	TCTCTTTTTTAATTACT	unknown		0.392987	1	-0.0177783	1	1.12992	0.653941	-0.284468	1	-0.871901	1	-3.49795	0.828505	0.839136	0.639075	-4.15206	0.00619209	-3.39143	0.0461121	2.57	0	5.59	0	0	0	0	0	0	0	0	7.32	2.66	7.11	0	0	0	0	0	0	0	0	0	0	0	0	0	0
StET027410	TTATATTTCCATAATAA	unknown		2.08152	0.497355	1.52152	0.491689	0.392211	1	-1.36153	0.366956	-1.40161	0.538073	-1.63928	0.114198	0.0168546	1	-3.52314	0.00546949	-3.46194	0.00270774	5.2	0	0	0	0	0	8.31	0	17.6	0	0	35.36	4.65	8.29	0	0	26.75	5.08	0	0	0	0	0	0	10.26	12.39	0	0
StET028246	TTCTTCTTGTGTTCTCT	unknown		1.20196	0.767425	1.67087	0.449079	-0.389423	0.974513	2.09445	0.308279	-1.49589	0.737513	-0.41987	1	0.417851	1	-3.06798	0.0469855	-2.73755	0.0465314	3.93	3.39	4	0	0	0	1.85	0	0	12.58	14.15	0	0	0	0	0	27.67	6.54	0	0	0	0	0	0	5.13	0	0	0
StET028460	TTGACTTGTTATTTCAA	unknown		1.56237	0.603392	0.0341756	1	2.78441	0.216295	1.26521	0.490593	-0.963332	0.970588	-3.23554	0.798992	-0.158269	1	-3.8747	0.0104903	-3.99186	0.0158079	2.79	0	0	0	0	0	0	0	0	14.37	0	0	1.33	0	0	0	0	0	0	0	0	0	0	0	0	0	0	0
StET029465	TTTAGAAATTCAAAAAA	unknown		2.23346	0.464969	1.60575	0.443894	2.64455	0.232956	1.37814	0.456684	-3.95093	0.335107	-2.99194	0.981235	-0.158269	1	-3.62776	0.0236522	-3.74409	0.0353741	2.68	0	0	0	0	0	0	16.93	2.51	0	0	8.54	0	0	0	0	0	10.9	0	0	0	0	0	0	0	0	0	0
[truncated: 17 more columns]
